1 **Cortical representation of touch *in silico***

2  
3 Chao Huang<sup>\*#</sup>, Fleur Zeldenrust<sup>\*</sup>, Tansu Celikel

4  
5 Department of Neurophysiology, Donders Institute for Brain, Cognition, and Behaviour,

6 Radboud University, Nijmegen - the Netherlands

7 # Current address: Department of Biology, University of Leipzig, Germany

8 \* denotes equal contribution.

9 Correspondence should be addressed to [celikel@neurophysiology.nl](mailto:celikel@neurophysiology.nl)

10

11 **Abstract**

12 With its six layers and ~12000 neurons, a cortical column is a complex network whose function is plausibly  
13 greater than the sum of its constituents'. Functional characterization of its network components will require  
14 going beyond the brute-force modulation of the neural activity of a small group of neurons. Here we  
15 introduce an open-source, biologically inspired, computationally efficient network model of the  
16 somatosensory cortex's granular and supragranular layers after reconstructing the barrel cortex in soma  
17 resolution. Comparisons of the network activity to empirical observations showed that the *in silico* network  
18 replicates the known properties of touch representations and whisker deprivation-induced changes in  
19 synaptic strength induced *in vivo*. Simulations show that the history of the membrane potential acts as a  
20 spatial filter that determines the presynaptic population of neurons contributing to a post-synaptic action  
21 potential; this spatial filtering might be critical for synaptic integration of top-down and bottom-up  
22 information.

23

|    |                                                                                                      |           |
|----|------------------------------------------------------------------------------------------------------|-----------|
| 24 | <b>Table of Contents</b>                                                                             |           |
| 25 | <b>Abstract</b> .....                                                                                | <b>0</b>  |
| 26 | <b>Introduction</b> .....                                                                            | <b>2</b>  |
| 27 | <b>Results</b> .....                                                                                 | <b>3</b>  |
| 28 | <b>Anatomical organization of the barrel cortex</b> .....                                            | <b>3</b>  |
| 29 | <b>Stimulus representations in silico network</b> .....                                              | <b>4</b>  |
| 30 | <b>The source of response variability in silico</b> .....                                            | <b>5</b>  |
| 31 | <b>Stimulus representations in L4 in silico</b> .....                                                | <b>6</b>  |
| 32 | <b>Stimulus representations in the supragranular layers in silico</b> .....                          | <b>8</b>  |
| 33 | <b>Experience-dependent plasticity of synaptic strength in silico</b> .....                          | <b>9</b>  |
| 34 | <b>Network representation of touch in vivo</b> .....                                                 | <b>9</b>  |
| 35 | <b>Discussion</b> .....                                                                              | <b>10</b> |
| 36 | <b>Technical considerations for anatomical reconstruction of a stereotypical barrel column</b> ..... | <b>10</b> |
| 37 | <b>Comparison with past cell counts</b> .....                                                        | <b>12</b> |
| 38 | <b>Comparison with other simulated networks</b> .....                                                | <b>12</b> |
| 39 | <b>Materials and Methods</b> .....                                                                   | <b>15</b> |
| 40 | <b>Experimental procedures</b> .....                                                                 | <b>15</b> |
| 41 | Tissue preparation and immunocytochemistry .....                                                     | 15        |
| 42 | Automated cell counting .....                                                                        | 15        |
| 43 | Nucleus-staining channels (NeuN, Parvalbumin and Calretinin) .....                                   | 15        |
| 44 | Cytosol-staining channels (GAD67 and Somatostatin) .....                                             | 19        |
| 45 | Generating an average barrel column.....                                                             | 19        |
| 46 | <b>Network setup</b> .....                                                                           | <b>20</b> |
| 47 | Neuronal Model.....                                                                                  | 20        |
| 48 | Neural Network Model.....                                                                            | 20        |
| 49 | Neural Distributions.....                                                                            | 20        |
| 50 | Connectivity .....                                                                                   | 21        |
| 51 | Synapses.....                                                                                        | 21        |
| 52 | Thalamic inputs into the barrel cortex <i>in silico</i> .....                                        | 22        |
| 53 | Spike-timing dependent plasticity .....                                                              | 23        |
| 54 | Simulated freely whisking experiment.....                                                            | 23        |
| 55 | <b>Acknowledgements</b> .....                                                                        | <b>25</b> |
| 56 | <b>References</b> .....                                                                              | <b>26</b> |
| 57 | <b>Figures</b> .....                                                                                 | <b>35</b> |
| 58 |                                                                                                      |           |
| 59 |                                                                                                      |           |

60

## 61 **Introduction**

62 One of the grand challenges in neuroscience is to mechanistically describe the cerebral cortical function.  
63 Numerous studies have identified the organizational principles of cortical circuits in various cortical areas  
64 across model systems by describing the principles of neuronal classification, cell-type specific projection  
65 patterns, input-output mapping across cortical layers, and by functional characterization of the anatomically  
66 identified neurons upon simple stimulation conditions, (see e.g. Douglas and Martin, 2004; Markram et al.,  
67 2015). Although a wiring-diagram approach is critical for a *structural* description of the network, relating  
68 the anatomical structure to network *function* will require a detailed study of the dynamical processes in  
69 single neurons as well as neural populations (Douglas and Martin, 2007; O'Connor et al., 2009). Or, in  
70 other words, one of the best ways to understand the functioning of the brain is trying to build one (Einevoll  
71 et al., 2019; Eliasmith and Trujillo, 2014). Accordingly, a large number of large-scale reconstructed  
72 computational models of cortical function (see Supplemental Table 1, the discussion section and this recent  
73 review (Fan and Markram, 2019)), including macaque (Chariker et al., 2016; Schmidt et al., 2018a, 2018b;  
74 Schuecker et al., 2017; Zhu et al., 2009), cat (Ananthanarayanan et al., 2009) and mouse/rat (Arkhipov et  
75 al., 2018; Billeh et al., 2019) visual cortex, rat auditory cortex (Traub et al., 2005), rat hindlimb sensory  
76 cortex (Markram et al., 2015), cerebellum (Sudhakar et al., 2017) and “stereotypical” mammalian  
77 neocortex (Izhikevich and Edelman, 2008; Markram, 2006; Potjans and Diesmann, 2014; Reimann et al.,  
78 2013; Tomsett et al., 2015), have been introduced, where neuronal dynamics are approximated using neuron  
79 models that range from integrate-and-fire point neurons (Ananthanarayanan et al. 2009, Sharp et al., 2014;  
80 Zhu et al., 2009, Potjans & Diesmann, 2014, Chariker et al. 2016, Bernardi et al. 2020, Schmidt et al.,  
81 2018a, Schmidt et a. 2018b, Schuecker et al. 2017) to morphologically reconstructed multi-compartment  
82 neurons (Traub et al. 2005, Markram et al. 2006, Izhikevich & Edelman 2008, Reimann et al. 2013,  
83 Markram et al. 2015, Tomsett et al., 2015, Sudhakar et al. 2017, Arkhipov et al. 2018, Billeh et al. 2019).  
84 These models have given insights in a range of topics including the nature of the local field potentials  
85 (Reimann et al., 2013; Tomsett et al., 2015), mechanisms of state transitions (Markram et al., 2015),  
86 frequency selectivity (Zhu et al., 2009), the influence of single-neuron properties on network activity  
87 (Arkhipov et al. 2018) and the relation between connectivity patterns and single-cell functional properties  
88 (i.e. receptive fields, Billeh et al. 2019).

89 With its topographical organization, well-characterized structural and functional organization, and its ever  
90 growing number of publicly available molecular, cellular and behavioural big datasets (Azarfar et al.,  
91 2018b; da Silva Lantyer et al., 2018; Kole et al., 2017, 2018a), the barrel column is ideally suited as a  
92 model system for computational reconstruction of circuit organization and function. Accordingly, large-

93 scale computational models of the rodent barrel cortex ranging from detailed reconstructed models that  
94 need to be run on a supercomputer (Phoka et al., 2012; Sharp et al., 2014) to much less detailed and  
95 computationally expensive models (Bernardi et al., 2020) have been developed. However, currently, there  
96 are not any publicly available tools available for biologically realistic network modeling that can be  
97 performed using a standard computer of today. Therefore, we developed an open-source biologically  
98 constrained computational network model of the granular and supragranular layers of the barrel cortex  
99 along with the ventroposterior medial thalamus. It is a detailed model, with cortical cell densities based on  
100 the reconstructions in soma resolution presented herein and our previous work on a temporal variation in  
101 response dynamics (Huang et al., 2016). The code can be run on a desktop computer with or without a  
102 CUDA enabled GPU and is available for download on GitHub  
103 (<https://github.com/DepartmentofNeurophysiology/Cortical-representation-of-touch-in-silico>). Here we  
104 show that this barrel cortex *in silico* can predict (a) emergent whisker representations, (b) changes in the  
105 synaptic strength upon whisker deprivation, (c) network representation of touch from behavioral data, using  
106 only the information extracted from whisker tracking. The model will help novel principles of information  
107 processing (Huang et al., 2020).

108

## 109 **Results**

### 110 ***Anatomical organization of the barrel cortex***

111 Just like most other neocortical areas, barrel columns consist of six layers with distinct molecular  
112 fingerprints and tens of different neural classes (Azarfar et al., 2018a; Fox, 2018; Kole et al., 2018b;  
113 Markram et al., 2004; Oberlaender et al., 2012; Thomson and Lamy, 2007). The reconstruction of the  
114 network in soma resolution (Figure 1, for detailed methods, see Materials and Methods) shows that the  
115 laminar distribution of cell-types varies significantly across layers. Similar to the laminar borders observed  
116 in the traditional Nissl staining, staining the column with neuronal nuclear antibody anti-NeuN, hereafter  
117 NeuN, results in a higher cellular density in Layer (L)4 and lower layers of L3 in comparison to L2 and L5-  
118 6. Inhibitory neurons stained with anti-GABA do not obey the laminar borders as outlined by the NeuN  
119 and display near equal densities in lower L4, L5b, and L1. Specific inhibitory neuron markers, however,  
120 have distinct expression patterns across the laminae: While Calretinin neurons are predominantly found in  
121 the L4/L3 border, Somatostatin neurons are preferentially located in the infragranular layers (Figure 1E).  
122 Parvalbumin-positive interneurons, on the other hand, are found at higher densities in L4 and L5. (Figure  
123 1E). The cellular distributions in the canonical D-row column can be found in Supplemental Table 2.

124

## 125 ***Stimulus representations in silico network***

126 To create a network model, three components are necessary: 1) the distribution of the nodes, 2) edges and  
127 3) a dynamic model of information transfer in single nodes. The first of these components, the distribution  
128 of nodes, was measured in the previous section (Figure 1). The second component, network connectivity,  
129 was determined using axonal and dendritic projection patterns (Egger et al., 2008; Feldmeyer et al., 2006,  
130 2002; Helmstaedter et al., 2008; Lübke et al., 2003), which were approximated by 3-D Gaussian functions  
131 (see Materials and Methods and Supplemental Table 3), with the assumption that the probability that two  
132 neurons are connected is proportional to the degree of axonal-dendritic overlap between these two neurons  
133 (i.e Peter's rule, (White, 1979)). For the third component, the dynamic model of single neurons, we  
134 modified the computationally efficient Izhikevich neuron model (Izhikevich, 2004, 2003) see Materials and  
135 Methods and Supplemental Table 4) to include the inverse relationship between the first derivative of the  
136 membrane potential, i.e the speed with which the synaptic depolarization rises, and the action potential  
137 threshold, so that the threshold is a function of the history of the membrane potential on (the membrane  
138 state (Huang et al., 2016; Zeldenrust et al., 2020)). This modification in the quadratic model did not affect  
139 the model's ability to predict the timing of action potentials upon sustained current injection in soma (see  
140 Figure 2A; compare the middle column to (Izhikevich, 2004, 2003) and also correctly predicted the rate  
141 and timing changes associated with the membrane state at a single neuron resolution (Figure 2A).

142 With the completion of the three required components for functional network creation, we constructed a  
143 biologically constrained barrel cortical column *in silico*. Due to the general lack of experimental data on  
144 the pairwise connectivity between infragranular layer neurons and the rest of the network, in this version  
145 of the *in silico* column, we have constrained the network to the top 630  $\mu\text{m}$  (Figure 2B), which is border  
146 between L4-L5 in the mouse. As the granular layer (L4) is the principal recipient of the thalamic inputs  
147 (Azarfar et al., 2018a) and strongly drives the supragranular (L1-3) layers, before the cross-columnar  
148 integration takes place across the upper L2/3, this model provides an *in silico* simulation environment for  
149 the first three stages of thalamocortical and intracortical information processing that involves supragranular  
150 and granular layers.

151  
152 In the simulated network, stimulus-evoked activity spreads across the network from ventroposterior medial  
153 nucleus (VPM) to L2/3 with latencies comparable to those observed in biological networks under anesthesia  
154 (Figure 2C, (Allen et al., 2003; Armstrong-James et al., 1992; Celikel et al., 2004). Inhibitory neurons had  
155 an earlier onset of spiking with a peak latency of  $8.2 \pm 0.6$  ms (mean  $\pm$  std) in L4 (Figure 2C), which  
156 corresponds to  $<3$  ms conduction delay, calculated from the population peristimulus time histograms  
157 (Figure 2C). These delays are similar to previous observations *in vivo* (Condylis et al., 2020; Dudai et al.,

158 2020; Sermet et al., 2019; Swadlow, 2003, 1995). In terms of the latency to an action potential, neurons  
159 across the entire depth of L4 were homogenous with the exception that those closer to the L3 border showed  
160 a delayed spiking (Figure 2D). As the feed-forward projections originating from L4 are the main inputs to  
161 the L2/3 neurons, the activity *in silico* naturally follows the latency distribution observed *in vivo* across the  
162 cortical layers, with L2 neurons generating action potential up to 4 ms later than the lower L3 neurons  
163 (Celikel et al., 2004); Figure 2C). Independent from the actual location of the neuron within the *silico*  
164 network, however, inhibitory neurons have an earlier onset of spiking as compared to the neighboring  
165 excitatory neurons within the layer (Figure 2D).

166 The spiking probability varies significantly across layers and neuron types *in vivo* (Celikel et al., 2004; De  
167 Kock et al., 2007; Gentet et al., 2012, 2010; O'Connor et al., 2010) and *in silico* (Figure 2D). Excitatory  
168 neurons respond to the stimulus sparsely, as the probability of a given neuron to generate an action potential  
169 at a given trial is low. When the stimulus does yield a suprathreshold response, the neuron typically  
170 generates a single action potential (Figure 2E). The response probability and the number of action  
171 potentials/stimulus depend on the laminar location of the neuron, its cell type and its subthreshold  
172 membrane potential prior to the stimulus (Figure 2E; (Zeldenrust et al., 2020)) The laminar position of the  
173 neuron, be it excitatory or inhibitory, does not play a role in state-dependent changes in excitability at the  
174 single neuron level, although neurons in the supragranular layers respond on average more reliably to  
175 stimuli. The only exception to this rule is when the stimulus arrives in a hyperpolarized membrane state;  
176 if the resting membrane potential prior to the stimulus onset averaged  $<-75$  mV, both excitatory and  
177 inhibitory neurons in L2/3 display failure rates higher than corresponding L4 neurons in the same membrane  
178 state (Figure 2E). This suggests that in hyperpolarized states, the activity of the supragranular layer is  
179 effectively uncoupled from the bottom-up sensory input.

180

### 181 ***The source of response variability in silico***

182 In a network where information propagates across synaptically coupled neurons via relatively weak, failure-  
183 prone and sparse connections, identical stimuli in the periphery will evoke distinct neural activation  
184 patterns, even if the measured spike rate and time are constant across presynaptic populations (given the  
185 stochasticity of the presynaptic population contributing to the postsynaptic spiking). Accordingly, neural  
186 representations in a biologically inspired *silico* network are expected to vary as a result of both the  
187 presynaptic spike timing variability and the changes in *effective connectivity* between layers and across  
188 trials discussed in the previous section.

189 To quantify the extent of the response variability *in silico*, we simulated the cortical responses to thalamic  
190 inputs in two conditions: (1) in every trial each thalamic spike train was generated as a result of an  
191 inhomogeneous Poisson process, constrained by the PSTH (see Figure 3A), or (2) a single realization of  
192 (1) was repeated over trials, so there was no trial-to-trial variability in the thalamic spike trains (see Figure  
193 3B) and the thalamic spike trains were identical across trials. While the former condition creates variability  
194 in spike timing and the rate at the single thalamic neuron resolution, the latter condition preserves the rate  
195 and timing of the thalamic input onto the postsynaptic cortical neurons across trials. The results showed  
196 that the effective connectivity, i.e. which presynaptic neurons contribute to the firing of a postsynaptic  
197 neuron in a given trial, is a major contributor to the response variability (Figure 3). This contribution was  
198 independent of the membrane state of the postsynaptic neuron and the neuron class, although the variability  
199 increased with membrane depolarization (Figure 3, A2-A3).

200

### 201 ***Stimulus representations in L4 in silico***

202 Thalamic neurons project extensively to cortical L4, and diffusely to the L3/L4 and L5b/6 borders (Arnold  
203 et al., 2001; Oberlaender et al., 2012; Sermet et al., 2019). This thalamocortical input is the principal  
204 pathway that carries the feedforward excitatory drive, carrying the bottom-up sensory information (Azarfar  
205 et al., 2018a) L4 representations of the sensory input are characterized by sparse neural representations *in*  
206 *vivo* (Aguilar, 2005; Celikel et al., 2004; De Kock et al., 2007) and *in silico* (Figure 4). Thalamic input  
207 modeling the principal whisker's stimulation *in vivo* results in a significant firing rate modulation (two  
208 orders of magnitude, between 0.02-2.2 spikes/stimulus/cell) in the network, depending on the membrane  
209 states of the L4 neurons prior to the stimulus arrival as well as the neuronal class studied (at  $v_r = -80$  mV,  
210 excitatory neurons fire at  $0.06 \pm 0.11$  spikes/stimulus, range 0-0.82; inhibitory neurons,  $0.68 \pm 0.71$   
211 spikes/stimulus, range 0-2.22; at  $v_r = -60$  mV, excitatory neurons,  $0.44 \pm 0.30$  spikes/stimulus, range 0-1.96;  
212 inhibitory neurons,  $2.13 \pm 1.48$  spikes/stimulus, range 0.02-6.54; values show mean  $\pm$  std). While excitatory  
213 neurons fire sparsely, inhibitory neurons spike with higher reliability (Figure 4C). The resting membrane  
214 potential changes the properties of excitatory neurons firing, as L4 excitatory neurons switch from a sparse  
215 representation (i.e. the probability of spiking for each neuron per stimulus is low, and when neurons spike  
216 they typically fire single action potentials) to less sparse spiking as membrane potential depolarizes (Figure  
217 4E). The inhibitory neural population, on the other hand, undergoes rate scaling as the resting membrane  
218 potential is depolarized (Figure 4E). Hence for the neural coding of stimuli in L4, the membrane state acts  
219 as a state-switch for excitatory neurons and a gain-modulator for the inhibitory neurons in the principal  
220 whisker's cortical column.

221

222 The spatial distribution of synaptic inputs in a network is primarily constrained by the axo-dendritic overlap  
223 across the synaptically connected neurons. Accordingly, with diffuse axonal projections of thalamic  
224 neurons, and spatially constrained dendritic branching to the barrel borders, excitatory and inhibitory L4  
225 neurons along the rostro-caudal (RC) and medio-lateral (MC) planes do not display a spatial bias in the  
226 tangential plane (Figure 4B). Unlike this spatial homogeneity of L4 responses to the stimulus, preferential  
227 laminar targeting of the thalamic input results in a higher likelihood of spiking in the bottom portion of the  
228 barrel, especially for postsynaptic excitatory neurons (Figure 4F).

229 The topographical nature of the representation of whisker touch dictates that each neuron has a preferred  
230 whisker, called the principal whisker, which evokes the largest number of action potentials upon deflection  
231 (Brecht and Sakmann, 2002; Foeller et al., 2005). However the receptive fields of cortical neurons are  
232 rarely (if ever) constrained to a single whisker, as multi-whisker receptive fields in the thalamus (Aguilar,  
233 2005; Armstrong-James and Callahan, 1991; Diamond et al., 1992; Kwegyir-Afful et al., 2005; Simons and  
234 Carvell, 1989) and cross-columnar projections in the cortex (Egger et al., 2008) ensure that each neuron  
235 receives information from multiple whiskers. Responses to the surround whiskers are always weaker, in  
236 number of spikes per stimulus, and arrive with a delay compared to the principal whisker deflection (Brecht  
237 and Sakmann, 2002). This relationship is preserved *in silico* representations of touch presented here (Figure  
238 4B, C, F). Principal vs surround whiskers activate excitatory and inhibitory neurons similarly, although  
239 evoked representations of surround whiskers are invariably weaker (Figure 4B). Similar to the principal  
240 whisker deflection, surround whisker stimulation results in largely homogenous representations across the  
241 RC-ML axis (Figure 4B) even if the postsynaptic spiking is constrained to depolarized membrane states.  
242 The sublaminar activation pattern in L4 results in a higher likelihood of spiking in the bottom half of L4,  
243 even after surround whisker stimulation (Figure 4F).

244 One main difference between the principal vs surround representations is the role of the membrane state in  
245 the modulation of network activity. Unlike the differential role of the resting membrane potential in  
246 encoding principal whisker touch across the excitatory and inhibitory networks, the contribution of the  
247 different membrane states to surround whisker representation slowly (but predictably) varies across  
248 different membrane states (Figure 4C). Most excitatory and inhibitory neurons in the surround L4 do not  
249 represent the stimulus information during the quiescent hyperpolarized membrane state, resulting in  
250 principal whisker specific cortical representations. In the depolarized membrane states, the probability of  
251 spiking disproportionately increases for the inhibitory neurons.



252

253 ***Stimulus representations in the supragranular layers in silico***

254 Feedforward L4 projections are powerful modulators of supragranular layers and bring the bottom-up  
255 information from the sensory periphery for eventual cross-columnar integration primarily via L2, and less  
256 so via upper L3 neurons (Kerr et al., 2007; Petersen, 2007; Petersen and Sakmann, 2001). Principles of  
257 sensory representations by L2/3 *in silico* (Figure 5) are generally similar to the L4 neurons, with the  
258 exceptions that (1) supragranular excitatory neurons have an increased probability of firing during surround  
259 whisker stimulation, and (2) the spatial localization of a neuron has predictive power for its response  
260 properties.

261 Unlike the granular layer representations of the stimulus in the quiescent membrane states, L2/3 excitatory  
262 neurons are completely silent at hyperpolarized membrane potentials, suggesting that the bottom-up  
263 thalamocortical information is decoupled from the rest of the cortical circuits that originate from the  
264 supragranular layers. The lack of spiking is not specific to the excitatory neurons, inhibitory neurons are  
265 similarly unresponsive to the L4 input if the resting membrane potential was hyperpolarized (Figure 5C).  
266 Although inhibitory neurons fire stimulus-evoked action potentials at hyperpolarized membrane potentials  
267 ( $< -70$  mV), the net effect of the membrane potential on suppressing cortical propagation of information  
268 via L2 is maintained across both classes of neurons (Figure 5). The lack of stimulus-evoked spiking in the  
269 surround column Figure 5 in resting membrane potentials  $< -70$  mV and the changes in the spike probability  
270 described before suggest that sensory representations are weak but specific to the principal whisker column  
271 during the quiescent states *in vivo*.

272

273 Given that the neuronal excitability changes with the membrane state, that the neural thresholds depend on  
274 the stimulus and membrane potential history and that each neuron will (not necessarily linearly) sum its  
275 inputs until this variable threshold, the effective connectivity within the network should change with the  
276 membrane state of the postsynaptic neuron. To visualize the effective connectivity we spatially mapped the  
277 presynaptic neurons that fired action potential(s) prior to the spiking of a postsynaptic neuron (Figure 6).  
278 As expected, the effective connectivity varied with the membrane state. With an increasing probability of  
279 L2/3 spiking in the depolarized membrane states, the contribution of the intralaminar input to the spiking  
280 increased, suggesting that in the depolarized membrane states, sensory representations are a function of  
281 feed-forward drive originating from L4 and local changes in excitability in L2/3. The latter component is  
282 likely to be modulated by top-down modulations as the state of the animal changes during, for example,  
283 active sensing, providing a mechanistic model how the bottom-up sensory information can be integrated  
284 with the top-down neuromodulatory influences.

285

### 286 ***Experience-dependent plasticity of synaptic strength in silico***

287 Neurons in the barrel cortex adapt to changes in sensory organ output as cortical circuits undergo plastic  
288 changes upon altered sensory input statistics (Allen et al., 2003; Clem et al., 2008; Feldman and Brecht,  
289 2005; Kole et al., 2018b). These adaptive changes have long-lasting consequences in neural representations  
290 of touch. We have, therefore, integrated a spike-timing-dependent plasticity learning rule (Celikel et al.,  
291 2004) to enable plastic changes in neural representations of touch in silico. Figure 7 shows the  
292 implementation of the model on a 3-column model of the barrel cortex, layers 2-4 (Figure 7A). Each  
293 column receives its major synaptic input from its own respective whisker in the form of thalamic  
294 representations of whisker touch (see above), with the exception that the center column lacks a principal  
295 whisker, mimicking the whisker deprivation condition (Figure 7B).

296

297 Employing empirically observed STDP rules in synapses at the feed-forward projections originating from  
298 L4 (Figure 7C; bottom) and the intracolumnar projections of L2/3 (Figure 7C; top) resulted in a  
299 reorganization of touch representation already within 100 trials, in agreement with the experimental  
300 observations in barrel cortical slices (Allen et al., 2003; Celikel et al., 2004). The model correctly predicted  
301 all the known pathways that are modified upon whisker deprivation including the potentiation in the spared  
302 whiskers' L4-L2/3 projections (Clem et al., 2008), slow depression in the deprived cortical column's L4-  
303 L2/3 projections (Bender et al., 2006) and plasticity of the oblique projections from L4 onto the neighboring  
304 L2/3 (Hardingham et al., 2011). The model further predicted a number of circuit changes, including the  
305 bidirectional changes across the cross-columnar projections between the spared and deprived columns,  
306 which could potentially explain the topographic map reorganization by receptive field plasticity

307

### 308 ***Network representation of touch in vivo***

309 As a final test of our in silico cortical column, we let it respond to an *in vivo*-like stimulation (Figure 8): as  
310 input to the network, we used recorded whisker angle (black) and curvature (red) from a freely moving rat  
311 in a pole localization task (data from (Peron et al., 2015)) made available as 'ssc-2' on CRCNS.org). We  
312 modeled thalamus as a network of 3 barreloids, each containing 200 'filter-and-fire' neurons that respond to  
313 whisker angle, curvature, or a combination of both. The center barreloid was considered to be the principal  
314 barreloid for the spared whisker, whereas the other two were considered surround barreloids, with reduced  
315 probability (30% of original amplitude) and delayed (2.5 ms) response latency (Brecht et al., 2003; Brecht  
316 and Sakmann, 2002). The response of the network is tightly localized, both in time and place (Figure 8C,D).  
317 The network response is also quite sparse (Figure 8B,E), with each neuron firing at most a few spikes per

318 trial. This response is a bit more sparse than typically observed (Peron et al., 2015), probably due to the  
319 lack of motor and top-down input in this model.

320 We compare the activity of a single barrel with evoked responses visualized using 2-photon imaging of  
321 calcium dynamics (Vogelstein et al., 2009). Although making a neuron-by-neuron comparison between  
322 networks is impossible, we can compare the overall activity of the networks. In both the recorded and the  
323 simulated networks, the activity is extremely sparse. The simulated network appears to have a few more  
324 neurons with a high firing frequency (Figure 9G), however, these do not adapt their firing frequency upon  
325 touch (Figure 9H), so they probably do not represent touch information (Peron et al., 2020). Otherwise,  
326 both networks show a comparable overall activity pattern.

327

## 328 **Discussion**

329 Understanding the circuit mechanisms of touch will require studying the somatosensory cortex as a  
330 dynamical complex system. Given that the majority of research in the barrel system has thus far focused  
331 on the identification of circuit components the development of a computational model of the barrel cortex  
332 is not only necessary but also feasible. Accordingly, we here employed a three-tiered approach to (1)  
333 reconstruct the barrel cortex in soma resolution, (2) implement a model neuron whose spiking is a function  
334 of the network activity impinging onto postsynaptic neurons, and (3) axo-dendritically connect neurons in  
335 the column based on Peter's rule and experimentally observed pairwise network connectivity (see Materials  
336 and Methods). We finally performed simulations in this network to compare neural representations of touch  
337 *in silico* to experimental observations from biological networks *in vivo*. As extensively discussed in the  
338 Results section, the simulations faithfully replicate experimental observations *in vivo* with high accuracy  
339 including, but not limited to, emergence of whisker representations, experience-dependent changes in  
340 synaptic strength and circuit representation of touch from behavioral data, using information from whisker  
341 displacement during tactile exploration. Thus, here we will focus on the methodological limitations and  
342 technical constraints of the network modeling as performed herein.

343

### 344 ***Technical considerations for anatomical reconstruction of a stereotypical barrel column***

345 One of the essential steps towards building a biologically plausible *in silico* model of the mouse barrel cortex  
346 is to obtain the distribution patterns of different neuron types throughout the barrel cortex. In the current  
347 study, we directly visualized these distributions by labeling different types of neurons using cell-type  
348 specific markers and digitized the data using confocal scanning microscopy to ultimately reconstruct the  
349 cortex in soma resolution upon automated counting of all neurons, independent from whether the markers  
350 are nuclear or cytoplasmic. The identities of individual barrels in L4 can be reliably recognized based on  
351 GAD67 immunostaining (Supplemental Figure 3). However, due to difficulties in aligning images across

352 consecutive sections, we could not consistently follow every barrel column across the entire cortical depth.  
353 Thus, in the current study, we only report average cell densities across a canonical barrel cortex rather than  
354 reconstructing the barrel cortex while preserving the columnar identity. Similarly, the *in silico* model places  
355 neurons and synapses stochastically every time a network is reconstructed, reflecting this inherent  
356 uncertainty. The advantage of this is, that simulations can be repeated over different realizations of networks  
357 with a similar structure, and this way it can be tested whether results are a general property of such networks  
358 or just a coincidental result of a particular realization of the network. It should be noted that, in the rat barrel  
359 cortex, the cell density across different barrel columns has been shown to be relatively constant (Meyer et  
360 al., 2013), making our density estimation likely to be accurate, as we employed a normalized volume for  
361 the entire column. Obviously, however, the absolute cell number in one barrel column could vary depending  
362 on the exact location of the barrel within the barrel cortex (Meyer et al., 2013).

363  
364 Our automatic cell counting algorithm for nuclear cell counts is functionally similar to that employed in  
365 (Oberlaender et al., 2009). Compared to their method, we used lower threshold values to separate  
366 foreground objects from their background in order to capture weakly stained cells. This comes at the  
367 expense of an increased number of connected clusters. We thus employed more sophisticated methods to  
368 separate clusters of connected cells, based on both intensity and shape information, rather than simply  
369 assuming that there exists a single dominant cell population based on volume, which could lead to bias  
370 when the assumption is not met (Oberlaender et al., 2009). Our method does not require manual correction,  
371 and the counting results are comparable with manual counts (Supplemental Table 5). Furthermore, we also  
372 developed algorithms to enable source localization for the cytoplasmic signals, which allowed us to quantify  
373 cellular classes, like somatostatin neurons, that are characterized by non-nuclear markers. Together these  
374 approaches have resulted in the most detailed quantification of the network, going beyond the two-neuron  
375 group (i.e. excitatory vs inhibitory) clustering available in the literature.

376  
377 Tissue shrinkage could affect cell density estimates. Although we project cell densities onto a normalized  
378 volumetric column, and although we have quantified the shrinkage of the sections, the cell density estimates  
379 might somewhat differ using alternative reconstruction methods. Another potential error could be  
380 introduced by cutting cells located at slice borders – these cells will appear in both slices, resulting in an  
381 overestimation of the cell count. We corrected for this overestimation by including only those cells within  
382 a given radius along the z-direction (which is orthogonal to the cutting plane) and no smaller than half of  
383 the average radius along x- and y-direction. This ensured that the overwhelming majority of the cells were  
384 not counted twice, as confirmed by the human observer quantifications.

385

386 ***Comparison with past cell counts***

387 In our data, the average neuronal density, as identified by NeuN staining, across all layers of the mouse  
388 barrel cortex is  $1.66 \times 10^5$  per  $\text{mm}^3$ , before correcting for tissue shrinkage. Assuming that each slice in our  
389 sample was cut precisely as a  $50 \mu\text{m}$  section, after immunostaining the average optical thickness of slices  
390 was reduced to  $32.5 \mu\text{m}$ , indicating a 34.8% shrinkage in z-direction. The shrinkage along x-y plane was  
391 generally much smaller in our protocol: imaged cells with a voxel size of 0.73-by-0.73-by-0.45 or 1.46-by-  
392 1.46-by-0.9  $\mu\text{m}$  showed similar pixel radius along x-, y- and z- axes (data not shown). If we assume that  
393 the real neurons have a similar radius along the 3 axes, the data suggests a shrinkage factor of  $\sim 2.3\%$  along  
394 x- and y- axes. After correcting for the estimated average shrinkage factors, the average neuronal density  
395 became  $1.03 \times 10^5$  per  $\text{mm}^3$ , in agreement with the previous observations made in the C57B6 mouse (i.e.  
396  $0.6 \times 10^5$ - $1.6 \times 10^5$  per  $\text{mm}^3$ , (Hodge et al., 2005; Irintchev et al., 2005; Lyck et al., 2007; Ma et al., 1999;  
397 Tsai et al., 2009)).

398

399 ***Comparison with other simulated networks***

400 Network models help explain network dynamics and information processing on many levels. Therefore,  
401 they exist at many different scales of complexity. On one extreme, simplified network models investigate  
402 how a single or a few aspects of the network (connectivity) properties affect network behavior. For instance,  
403 randomly connected balanced networks use integrate-and-fire neuron models (Brunel, 2000), binary neuron  
404 models (van Vreeswijk and Sompolinsky, 1998, 1996), or rate neuron models (Sompolinsky et al., 1988)  
405 to investigate the effects of synaptic sparseness, connectivity strength and the balance between excitation  
406 and inhibition on network dynamics. Similarly, like discussed in the introduction, feed-forward networks  
407 like the perceptron (Rosenblatt, 1958) can explain the increasing abstraction of receptive fields in sensory  
408 perception using similar simplified neuron models (Seung and Yuste, 2012) and randomly connected  
409 symmetric networks (Hopfield, 1982) can explain associative memory. Finally, the dynamics of small-  
410 world networks (Watts and Strogatz, 1998) have several special properties such as rapid (near-critical)  
411 synchronization, low wiring costs and a balance between locally specialized and large-scale distributed  
412 information processing (Bassett and Bullmore, 2006; Stam and Reijneveld, 2007).

413

414 Although simplified networks are often very powerful in providing (analytical) explanations about the  
415 influence of connectivity on network behavior, they are biologically not very realistic. A middle ground  
416 can be found in biologically-inspired networks that use the intrinsic connectivity schemes found in the  
417 brain. These model networks often make specific predictions about the effects of network properties on  
418 dynamics, although analytical solutions are mostly not feasible (see for instance (Rubin and Terman, 2004;  
419 Tort et al., 2007; Wendling et al., 2002)(Tort et al., 2007), (Rubin and Terman, 2004)).

420 Another intermediate level of network modeling involves fitting functional models to whole-network  
421 recordings (e.g. Generalized Linear Models (GLMs) (Paninski, 2004; Pillow et al., 2008; Truccolo et al.,  
422 2005), Generalized Integrate-and-Fire models (GIF models) (Gerstner and Kistler, 2002; Jolivet et al.,  
423 2004)). With these types of models, the spiking behavior and functional connectivity of entire networks can  
424 be fitted to network recordings. The results from such an analysis can be difficult to link to biophysical  
425 properties of the neurons and networks, but it is a very successful method for describing the functional  
426 connectivity of for instance the macaque, salamander, cat and rabbit retina (Denk and Detwiler, 1999; Doi  
427 et al., 2012; Keat et al., 2001; Li et al., 2015; Marre et al., 2012; Pillow et al., 2008; Reich et al., 1998) (for  
428 a review see (Field and Chichilnisky, 2007)) and *C. elegans* (Kato et al., 2015).

429  
430 Finally, on the other extreme, are biologically reconstructed networks, like the one we present here. For  
431 some systems, complete or partial wiring diagrams have been published (*C. elegans* (Varshney and Beth L.  
432 Chen, 2011), mouse retina (Helmstaedter et al., 2013)), that can be used to construct such models. A notable  
433 example is the crustacean stomatogastric ganglion system, that has been extensively studied and simulated,  
434 leading to variable invaluable insights into neural network functioning in general (Marder and Goaillard,  
435 2006; Prinz et al., 2004). These networks are biologically realistic, but because of their complexity, it is  
436 more difficult to analyze the influence of specific network properties on network dynamics and function.  
437 Moreover, one concern is that with the current methods, it is still impossible to measure all relevant  
438 parameters (molecular cell-type, electrophysiological cell-type, cell location, structural connectivity,  
439 functional connectivity) in a single sample. Therefore, every biologically reconstructed network so far is a  
440 combination of properties from different individuals and even animals. Whether such a synthesized model  
441 is a good approximation of the actual functional neural network remains to be seen (Edelman and Gally,  
442 2001; Marder and Taylor, 2011). Moreover, all current reconstructed networks are limited in their scope:  
443 right now it is not feasible to reconstruct and model the whole brain. For the barrel cortex presented here,  
444 that means that motor and top-down input are missing, which results in reduced neural activity *in silico*  
445 than observed experimentally (compare Figure 8 and 9 to (Peron et al., 2015)) especially during  
446 hyperpolarized membrane potentials. Despite these limitations, biologically reconstructed network models  
447 are very important as a testing ground for hypotheses based on more simplified networks, or to assess  
448 biological parameters that are difficult or impossible to measure experimentally, such as the effects of  
449 threshold adaptation (Huang et al., 2016; Zeldenrust et al., 2020) or the effects of different coding schemes  
450 (Huang et al., 2020). In Supplemental Table 1, we have summarized the properties of several biologically  
451 reconstructed networks that have been published. Note that until now, many of these reconstructed networks  
452 have to be run on a cluster of computers or on a supercomputer, because a simple desktop computer simply  
453 lacked the computational power to run a biologically reconstructed network and/or did not make the code

454 available (Tomsett et al., 2015) being an exception). We used simplified neuron models instead of  
455 reconstructed multi-compartmental models, increasing the computational efficiency, but possibly missing  
456 effects due to the morphology, such as certain forms of bursting (Zeldenrust et al., 2018), dendritic  
457 computation (Chu et al., 2020) or axon-initial segment effects (Kole and Brette, 2018). Finally, like the  
458 recent model by Markram et al. (Markram et al., 2015), we used no parameter tuning to construct this  
459 model, other than making the different cell-types of the Izhikevich-model and controlling the cell-type  
460 specific connection probabilities. All this makes the model very accessible for quickly testing fundamental  
461 hypotheses systematically (Huang et al., 2020, 2016).

## 462 **Materials and Methods**

### 463 *Experimental procedures*

#### 464 Tissue preparation and immunochemistry

465 The slices from the barrel cortex were described before (Kole et al., 2020; Kole and Celikel, 2019) with  
466 minor modifications. In short, juvenile mice from either sex were perfused using 4% paraformaldehyde  
467 before tangential sections were prepared. To ensure that cortical layers were orthogonal to the slicing plane  
468 the cortex was removed from the subcortical areas and medio-lateral and rostro-caudal borders trimmed.  
469 The remaining neocortex included the entire barrel cortex and was immobilized between two glass slides  
470 using four 1.2 mm metal spacers. The rest of the histological process, including post-fixation and sucrose  
471 treatment, was performed while the neocortex was flattened. All care was given to ensure that the tissue is  
472 as flat as possible at the time of placement onto the sliding horizontal microtome. 50-micron sections were  
473 cut and processed using standard immunohistochemical protocols. The following antibodies were used:  
474 anti-NeuN (Millipore, Chicken), anti-GAD67 (Boehringer Mannheim, Mouse), anti-GABA (Sigma,  
475 Rabbit), anti-Parvalbumin (PV, Swant Antibodies, Goat), anti-Somatostatin (SST, Millipore, Rat), anti-  
476 Calretinin (CR, Swant Antibodies, Goat), anti- vasointestinal peptide (VIP, Millipore, Rabbit)  
477 at concentrations suggested by the provider.

478 The imaging was performed using a Leica Confocal microscope (LCS SP2) with a 20X objective  
479 (NA 0.8). Each section sequentially cutting across layers was individually scanned with 512x512 pixel  
480 resolution; the signal in each pixel was average after 4 scans and before it was stored. The alignment of  
481 each section was performed automatically using a fast Fourier transform based image registration method  
482 (Guizar-Sicairos et al., 2008)

#### 483 Automated cell counting

484 All image analysis was done using a custom-written running toolbox in Matlab 2012b with an Image  
485 Processing Toolbox add-on (Mathworks).

#### 486 Nucleus-staining channels (NeuN, Parvalbumin and Calretinin)

487 Most fluorescence imaging methods, including confocal microscopy, have several shortcomings that make  
488 the automated cell identification a challenging task: First, the background intensity of images is often  
489 uneven due to light scattering and tissue auto-fluorescence. Shading and bleaching of fluorophores further  
490 add to this problem when acquiring multiple confocal images at the same location. Second, intensity  
491 variation within a single cell might cause over-segmentation of the cell. Third, the intensity of different  
492 neuron populations turn out to be very different because they absorb fluorescent dye unevenly. Specifically,  
493 GAD67+ and SST+ neurons usually have a weakly stained nucleus as visualized by anti-NeuN antibody,



494 making non-linear gain modulation necessary in a cell-type specific manner. To overcome these problems  
495 and maximize the hit and correct rejection rate over miss and false positives (i.e.  $(H+CR)/(M+FP)$ ), we  
496 have developed the following pipeline:

497 **Pre-processing:** The goal of pre-processing is to obtain relatively consistent images from original  
498 fluorescent images with varying quality to pass to the cell count algorithm, so the same algorithm can  
499 process a large variety of images and still get consistent results. Depending on the nature of the individual  
500 channel, i.e. which antibody was used, different pre-processing steps were employed.

501 **Median filtering:** A median filter with  $3 \times 3 \times 3$  pixel neighborhood is applied to fluorescent image  
502 stacks to smooth intensity distribution within each image stack in 3D. This operation removes local high-  
503 frequency intensity variations (Supplemental Figure 1b).

504 **Vignetting correction:** Vignetting is the phenomenon of intensity attenuation away from the image  
505 center. We use a single-image based vignetting correction method (Zheng et al., 2009) to correct for the  
506 intensity attenuation (Supplemental Figure 1c). The algorithm extracts vignetting information using  
507 segmentation techniques, which separate the vignetting effect from other sources of intensity variations  
508 such as texture. The resulting image is the foreground, i.e. the cellular processes, on a homogenous  
509 background.

510 **Background subtraction:** Background can result from non-specific binding of antibodies or auto-  
511 fluorescence of the tissue. To reduce the background noise, local minima in each original grayscale image  
512 are filled by morphological filling, and background is estimated by morphological opening with 15 pixel  
513 radius disk-shaped structuring element. The radius value is chosen to be comparable to the largest object  
514 size so the potential object pixels are not affected. The estimated background is then subtracted from the  
515 original image to enhance signal-to-noise ratio, SNR (Supplemental Figure 1d).

516 **Contrast-limited adaptive histogram equalization (CLAHE):** CLAHE (Heckbert, 1994)  
517 enhances local contrast within individual images by remapping intensity value of each pixel using a  
518 transformation function derived from its neighbourhood. While increasing local contrast and amplifying  
519 weakly stained cells, it also reduces global intensity difference, which partially corrects for the uneven  
520 illumination that individual fluorescent images often suffer from (Supplemental Figure 1e). CLAHE is  
521 applied as an  $8 \times 8$  tiles division for each image. Images from channels with very low number of positive  
522 staining with high SNR (e.g. Calretinin staining channel) are not processed with CLAHE.

523 Image segmentation to identify cell nucleus

524 Black-and-white image transform is applied to grayscale images to separate foreground, i.e regions  
525 presumably contain nuclei, from background. In the ideal conditions, if all the objects were stained evenly  
526 during immunochemistry, the image pixels' intensity value will be distributed as two well-separated  
527 Gaussian distributions. However, objects are usually not evenly stained; specifically, GAD67+ and SST+

528 neurons usually have weak NeuN staining. As a result, the intensity distribution for object pixels is very  
529 broad and cannot be described by a single Gaussian distribution. To reliably identify foreground pixels we  
530 calculated threshold values using 2-level Otsu's method (Otsu, 1979), which separates the pixels into 3  
531 groups. The group with the lowest intensity reliably captures the background pixels, and the other 2 groups  
532 are set to the foreground. This transformation is directly applied to 3D image stack to obtain 3D foreground  
533 (Supplemental Figure 1f).

534 **Marker-based watershed segmentation:** B&W transform identified regions contains cell  
535 nucleus, albeit non-specifically, and it does not identify the location and shape of each individual nucleus  
536 stained, thus image segmentation is needed to identify individual nuclei. Watershed method (Meyer, 1994)  
537 is an efficient way of segmenting grayscale images, i.e. foreground part of image obtained by B&W  
538 transformation based on gradient, and has the advantage of operating on local image gradient instead of  
539 global gradient. However, direct application of watershed methods usually results in over-segmentation of  
540 nuclei due to local intensity variation within individual nuclei. To overcome this problem, marker-based  
541 watershed algorithm is employed, in which markers serving as starting 'basin' for each object are first placed  
542 on an image to be segmented, and watershed algorithm is then applied to produce one segment (or object)  
543 on each marker.

544 We computed the markers by applying regional maxima transform on foreground grey-scale  
545 images. To ensure at most one marker is placed in each nucleus, first the grey-scale image need to be  
546 smoothed to eliminate local intensity variation. This is realized by applying morphological opening-by-  
547 reconstruction operation (Vincent, 1993) with 5 pixels radius on foreground grayscale image, which  
548 removes small blemishes in each individual nucleus and ensures regional maxima transform can find  
549 foreground markers accurately.

550 After identifying markers watershed algorithm is applied (Supplemental Figure 1g). To ensure  
551 accurate detection of cell boundaries, the B&W foreground needs to enclose the entire cell object. This  
552 image dilation is applied to the B&W foreground to enlarge it by 1 pixel in radius before application of  
553 watershed segmentation algorithm. Finally, objects with size smaller than 400 pixels in total are removed  
554 by morphological opening.

555 **Corrections for clusters of connected neurons:** Clusters of closely located neurons are not always  
556 successfully separated without further image processing; especially when closely located neurons all have  
557 similar intensity distribution. In such cases application of intensity-based watershed algorithms result in  
558 identification of one object instead of many real neurons (Supplemental Figure 1b). Furthermore, our  
559 strategy for watershed segmentation to augment regional intensity similarity to make sure that nuclei are  
560 over-segmented actually increases the chance of under-segmentation during clustering. To correct for this  
561 under-segmentation we employed a five-step approach:

562 a. The volume (total number of pixels) of all identified objects is calculated, and objects with a  
563 volume larger than mean+std of the population are labeled as “potential clusters”.

564 b. For each object in the potential cluster list, the original grayscale image is retrieved. Then, from  
565 all the pixels contained in the object, 50% pixels with lower intensity values are removed, generating a new  
566 B&W object with a smaller size. Because usually, those low-intensity pixels are from the periphery region  
567 of each individual neuron, the new B&W object has better separation between different neurons.

568 c. Euclidean distance-based 3-D regional maximum transform is then applied to the new, smaller  
569 B&W 3-D candidate object, in which the distance from each pixel belongs to the object to the border of the  
570 object, is calculated. Assuming neurons have Ellipsoid-like shape, the peak (largest distance from borders)  
571 of this transform will likely be the center of neurons, even if they are connected. The regional maximum  
572 transform is then applied to locate those peaks in the Euclidean distance space. Before the regional  
573 maximum transform is applied, the target image is smoothed by morphological opening-by-reconstruction  
574 operation with 1-pixel radius to remove small local variations.

575 d. If more than one center is found (in c) watershed method is applied to the distance transform of  
576 the original B&W object, using the identified centers as markers. If only one center is found then the cluster  
577 is judged as a single neuron and removed from the list. Again, the distance metric is smoothed by a  
578 morphological opening-by-reconstruction operation before the watershed algorithm is applied.

579 e. Steps a-d is repeated until the “potential cluster list” is empty (Supplemental Figure 1h).

580 **Morphological filtering:** Neurons have a certain shape and volume. Based on this statistical  
581 information clustered objects can be filtered to remove small artifacts. This is necessary because of the low  
582 threshold value used for the foreground generation. To remove the artifacts from neurons we first performed  
583 a morphological opening with a structure whose size is 1/3 of the size of each object’s bounding box. The  
584 bounding box is calculated in 3-D hence it is the smallest cube that contains the object. This operation  
585 breaks down irregular shapes but keeps relatively regular shapes (sphere, ellipsoid, cuboid) intact. Then,  
586 both pixel size (volume) and mean intensity of the objects are fitted with a Gaussian mixture model, and  
587 the group with the smallest pixel size and lowest mean intensity is judged as an artifact and is removed.  
588 (Supplemental Figure 1f).

589 **Combining information from different soma-staining channels:** Cells identified from each  
590 channel are added together to give cumulative soma counts across all antibody channels. Overlapped objects  
591 are judged to be different cells if:

592 a. Overlapping is smaller than 30% of any object volume constituting the cluster

593 b. after subtraction the new object preserves the ellipsoid shape

594

595 Cytosol-staining channels (GAD67 and Somatostatin)

596 Identification of the cells in cytosol-staining channels utilizes reference information gathered from  
597 the soma-staining channels, hence segmentation of cytosolic signals requires at least one nuclear channel  
598 staining.

599 Early stages of the image processing for the cytosolic signal localization was identical to that of  
600 soma-staining channels except CLAHE step. Subsequently, cell objects were imported from combined  
601 soma-staining channels information (Supplemental Figure 2c).

602 For each cell object, two additional pixels were added to the diameter of the object (Supplemental  
603 Figure 2d). This enlarged cell object is used as a mask to detect positive staining in the cytosol-staining  
604 channel (Supplemental Figure 2f). Positive staining was defined as connected pixels with a volume at least  
605 10% of the object and that they have significantly higher intensity compared to the pixels within 2.5 times  
606 of the associated cell (Supplemental Figure 2g). Finally, the percentage of positive staining was obtained  
607 and used to identify GAD67 or Somatostatin positive cells.

608 Performance comparison between computer and the human observer

609 Three human observers independently counted a number of 3-D images stacks from different  
610 antibody staining, using Vaa3D software (Peng et al., 2010). Three identical copies of each image stack  
611 were placed in the manual counting dataset in random order; the human observers subsequently confirmed  
612 that they did not notice the duplicates in the data set they had analyzed. The automated counting result was  
613 compared with the average human counting result, and the summary of the difference is shown in  
614 Supplemental Table 5.

615 Generating an average barrel column

616 After performing automatic cell counting on individual slices across different cortical depths, we calculated  
617 average cell density for different types of cells identified by distinct antibody channels at a given cortical  
618 depth as indicated by slice number. Tissue shrinkage was not corrected but the average column size was  
619 empirically determined. To account for the differences in cortical thickness across different animals, we  
620 then binned the density data from each individual animal into 20 bins, which were subsequently averaged  
621 to obtain the average cell density distribution across cortical depth. The layer borders  $z_{lim}$  between different  
622 cortical layers (L1-L2/3, L2/3-L4, L4-L5, L5-L6) were determined as described previously (Meyer et al.,  
623 2010), by first fitting a Gaussian function

624 
$$g(z) = c_1 + c_2 e^{-(z-z_0)^2/2\sigma^2} \quad (1)$$

625 to the NeuN+ cell density profile along with cortical depth with manually set  $c_1$ ,  $c_2$  and  $z_0$ , and then the  
626 respective  $z_{lim}$  was calculated as

627

628 
$$z_{lim} = z_0 \pm \sigma \sqrt{2 \ln 2} \quad (2)$$

629 L5A-L5B border was determined by manual inspection on NeuN+ cell density. We then calculated the size  
630 of an average barrel in C-E rows, 1-3 columns by manually labeling corresponding barrels in anti-GAD67  
631 staining (Supplemental Figure 3). The number of different types of cells in an average barrel from C-E  
632 rows, 1-3 columns was then calculated by the size as well as the corresponding cell density.

633

## 634 *Network setup*

### 635 Neuronal Model

636 We used the Izhikevich quadratic model neuron (Izhikevich, 2004, 2003) in this study:

637 
$$\frac{dv}{dt} = 0.04(v - v_r)(v - v_t) - u + I \quad (3)$$

638 where  $v$ ,  $v_r$ , and  $v_t$  are the membrane potential, resting membrane potential without stimulus, and the spike  
639 threshold of the neuron, respectively and  $I$  is the synaptic current the neuron received (see below). The  
640 dynamics of the recovery variable  $u$  are determined by:

641 
$$\frac{du}{dt} = a(b(v - v_r) - u) \quad (4)$$

642 Parameters  $a$ ,  $b$ ,  $c$ ,  $d$  together determine the firing pattern of the model neuron (see Supplemental Table  
643 4). The model has the following reset condition:

644 
$$\text{if } v \geq 30 \begin{cases} v \leftarrow c \\ u \leftarrow u + d \end{cases} \quad (5)$$

645 Parameters  $a$ ,  $b$  and  $c$  were taken from (Izhikevich, 2003); parameter  $d$  was adapted to match firing rates  
646 observed in the literature (see 4.2.2). For the simulations, a first-order Euler method with a step size of 0.1  
647 ms was used.

### 648 Neural Network Model

#### 649 Neural Distributions

650 The mouse barrel cortex L4-L2/3 network is modeled based on the distribution of different classes of  
651 neurons in an average barrel reconstructed by immunochemical labeling and confocal microscopy (see  
652 above). 13 different types of cortical neurons are included in the model (Markram et al., 2004; Oberlaender  
653 et al., 2012; Thomson and Lamy, 2007). In L2/3 there are 9 types of neurons, 2 excitatory: L2 pyramidal  
654 neurons and L3 pyramidal neurons (Brecht et al., 2003; Feldmeyer et al., 2006); 7 inhibitory: PV+ fast-  
655 spiking neurons (Holmgren et al., 2003; Packer and Yuste, 2011), PV+ bursting neurons (Blatow et al.,

656 2003), SST+ Martinotti neurons (Fino and Yuste, 2011; Kapfer et al., 2007; Wang et al., 2004) ,  
657 Neurogliaform cells (Tamás et al., 2003; Wozny and Williams, 2011), CR+ bipolar neurons (Caputi et al.,  
658 2009; Xu et al., 2006), CR+/VIP+ multipolar neurons (Caputi et al., 2009) and VIP+/CR- neurons (Porter  
659 et al., 1998). In L4 there are 4 types of neurons, 2 excitatory: L4 spiny stellate neurons and L4 star pyramidal  
660 neurons (Egger et al., 2008; Staiger et al., 2004); 2 inhibitory: PV+ fast-spiking neurons and PV- low-  
661 threshold spiking neurons (Beierlein et al., 2003; Koelbl et al., 2015; Sun et al., 2006). The distribution of  
662 excitatory, PV+, CR+, and SST+ neurons are taken from the anatomical reconstructions; for other cell  
663 types, we assigned corresponding number of different neurons in each cluster based on the previous studies  
664 (Kawaguchi and Kubota, 1997; Uematsu et al., 2008). These neurons were distributed in a 640-by-300-by-  
665 300  $\mu\text{m}$  region (L4, 210-by-300-by-300; L2/3, 430-by-300-by-300). Note that we scaled the size of the  
666 network to match the average dimension of a rat column (Feldmeyer et al., 2006), due to the fact that most  
667 of the axonal and dendritic projection patterns were measured in the rat.

### 668 Connectivity

669 Connectivity is determined using axonal and dendritic projection patterns (Egger et al., 2008; Feldmeyer et  
670 al., 2006, 2002; Helmstaedter et al., 2008; Lübke et al., 2003) which are approximated by 3-D Gaussian  
671 functions, with the assumption that the probability that two neurons are connected is proportional to the  
672 degree of axonal-dendritic overlap between these two neurons (i.e Peter's rule, (White, 1979)). For each  
673 pre-synaptic  $i$  and post-synaptic neuron  $j$ , we calculate the axonal-dendritic overlapping index  $I_{i,j}$ , which is  
674 the sum of the product of presynaptic axonal distribution and postsynaptic dendritic distribution  $D_j$ :

$$675 \quad I_{i,j} = \int_x \int_y \int_z A_i D_j dx dy dz, \quad x, y \in SD_j(6)$$

676 where  $SD_j$  is the 3-D space that contains 99.9% of  $D_j$ . We then convert  $I_{i,j}$  into connection probability  $P_{i,j}$   
677 between neuron  $i$  and  $j$ , by choosing a constant  $k$  for each unique pre- and post-synaptic cell type pair so  
678 that the average connection probability within experimentally measured inter-soma distances (usually 100  
679  $\mu\text{m}$ ) matches the empirically measured values between these two types of cells (Supplemental Table 3):

$$680 \quad P_{i,j} = k \cdot I_{i,j} \quad (7)$$

681 Finally, a binary connectivity matrix was randomly generated using the pairwise connection probabilities  
682  $P_{i,j}$ , in which connected pairs are labeled as 1.

### 683 Synapses

684 Synaptic currents in this network are modeled by a double-exponential function. Parameters of those  
685 functions are adjusted to match experimentally measured PSPs (peak amplitude, rise time, half-width,  
686 failure rate, coefficient of variation and pair-pulse ratio) in the barrel cortex *in vitro* (Supplemental Table  
687 3; see (Thomson and Lamy, 2007) for an extensive review). The onset latency is calculated from the

688 distance between cell pairs; the conduction velocity of the action potential was set to 190 $\mu$ m/ms (Feldmeyer  
689 et al., 2002). The short-term synaptic dynamics (pair-pulse depression/facilitation) is modeled as a scalar  
690 multiplier to actual synaptic weight, which follows a single exponential dynamic (Izhikevich and Edelman,  
691 2008):

$$692 \quad \frac{dx}{dt} = \frac{I - x}{\tau_x}, \quad x \leftarrow px \text{ when presynaptic neuron fires (8)}$$

693  $\tau_x$  was set to 150ms for excitatory synapses and depression inhibitory synapses ( $p < 1$ ), and 100ms for  
694 facilitating inhibitory synapses ( $p > 1$ ). Differences in the activation state of cortex are included in the model  
695 by setting the common initial voltage and the equilibrium potential  $v_r$  of all cells, thus accounting for  
696 potential up - and down-states as well as an intermediate state.

697

### 698 Thalamic inputs into the barrel cortex *in silico*

699 To the best of our knowledge, there is not any published quantitative work on the cellular  
700 organization of the mouse thalamic nuclei. In the rat, each barreloid in thalamic VPM nuclei has  $\sim 1/18$   
701 number of neurons compared to the corresponding L4 barrel (Meyer et al., 2013). Given that in our average  
702 barrel column L4 contains  $\sim 1600$  neurons, we assigned between 100 and 200 thalamic neurons to each  
703 barreloid in VPM. The thalamic-cortical connectivity is calculated using the same method as cortical-  
704 cortical connectivity discussed above, using published thalamic axon projection patterns (Furuta et al.,  
705 2011; Oberlaender et al., 2012). The POM pathway was not modeled.

706 Each of the thalamic neurons is modelled as a ‘filter and fire’ neuron (Chichilnisky, 2001; Keat et  
707 al., 2001; Pillow et al., 2008; Truccolo et al., 2005), where each of the thalamic neurons responds to either  
708 whisker angle (filters and activation functions randomly chosen based on a parametrization of the filters  
709 from (Petersen et al., 2008)), curvature, or a combination of both. The center barreloid was considered to  
710 be the principal barreloid for the spared whisker, whereas the other two were considered secondary  
711 barreloids, which meant that they received the stimuli reduced (30% of original amplitude) and delayed  
712 (2.5 ms) (Brecht et al., 2003; Brecht and Sakmann, 2002). The thalamic spike trains served as input to the  
713 cortical model, which similarly consisted of three cortical columns, corresponding to the three thalamic  
714 barreloids. An example of how to run these simulations can be found on Github:

715 <https://github.com/DepartmentofNeurophysiology/Cortical-representation-of-touch-in-silico>.

716 Thalamic stimulation in the model based on population PSTHs (Figures 2-7) was collected  
717 extracellularly in anesthetized animals *in vivo* (Aguilar, 2005). The PSTHs only specified the population  
718 firing rate in the thalamic cells; to generate individual neuron response in different trials we assume that  
719 thalamic neurons fire independent Poisson spike trains in each trial, constrained by the PSTHs.

720 Spike-timing dependent plasticity

721 A network of 3 barrel columns, representing canonical C,D,E rows, was constructed to simulate spike-  
722 timing-dependent plasticity in the barrel cortex following a single (D-row) whisker deprivation. Each  
723 column was randomly generated using distributions of 13 different types of neurons, and connectivity was  
724 calculated using the same method discussed above. The middle column was whisker-deprived, which  
725 received surround whisker evoked thalamic input; the two lateral columns were whisker-spared and  
726 received principal whisker evoked thalamic input (Aguilar, 2005). The STDP rule for L4-L2/3 excitatory  
727 connections was as follows (Celikel et al., 2004):

$$dA = \begin{cases} -3.7 \cdot 10^6 (\Delta t)^2 - 0.0019 \Delta t + 0.77 & \text{if } -250 \leq \Delta t \leq 0 \\ \frac{0.5665 \Delta t}{3} - 0.23 & \text{if } 0 < \Delta t < 3 \\ -4.7 \cdot 10^{-7} (\Delta t)^3 + 0.00028 \cdot (\Delta t)^2 - 0.022 \Delta t + 1.4 & \text{if } 3 \leq \Delta t \leq 32 \end{cases} \quad (9)$$

728

729  $\Delta t$  was the timing difference (in ms) between the time at which presynaptic spike arrives at postsynaptic  
730 neuron (i.e. presynaptic neuron spike time plus synaptic delay) and the time at which the postsynaptic  
731 neuron spikes ms. The constants were directly taken from the literature, in which the values were obtained  
732 by least-square fits to the experimental data. For L2/3-L2/3 excitatory connections, the rule was as follows  
733 (Banerjee et al., 2014):

$$dA = \begin{cases} \frac{0.53}{100} e^{-\frac{\Delta t}{18}} & \text{if } \Delta t > 0 \\ -\frac{0.32}{100} e^{-\frac{\Delta t}{18}} & \text{if } \Delta t < 0 \end{cases} \quad (10)$$

734

735 The synaptic weight change was additive for potentiation and multiplicative for depression; repeating the  
736 simulations with an additive rule for potentiation and depression did not change the results and are not  
737 shown herein. Plasticity rules for excitatory-inhibitory and inhibitory connections are less commonly  
738 studied. Inclusion of the empirically identified learning curves (Haas et al., 2006; Lu et al., 2007) did not  
739 qualitatively alter the results and are not included herein.

740 Simulated freely whisking experiment

741 In the simulations of a freely whisking experiment, the network (Figure 8: 3 barrels, Figure 9: 1 barrel) was  
742 presented with the whisker angle and curvature recorded from a freely moving rat (animal an171923,



743 session 2012\_06\_04) in a pole localization task (data from (Peron et al., 2015) made available as 'ssc-2' on  
744 CRCNS.org).  
745 NB Direct whisker modulation by motor cortex (Crochet et al., 2011) can be optionally included in the  
746 model, but was not used for our current simulations. However, it is present in the online code as option.  
747  
748

749 **Acknowledgements**

750 This work was supported by grants from the European Commission (Horizon2020, nr. 660328), European  
751 Regional Development Fund (MIND, nr. 122035) and the Netherlands Organisation for Scientific Research  
752 (NWO-ALW Open Competition, nr. 824.14.022) to TC and by the Netherlands Organisation for Scientific  
753 Research (NWO Veni Research Grant, nr. 863.150.25) to FZ.

754 **References**

- 755 Aguilar JR. 2005. Spatiotemporal Gating of Sensory Inputs in Thalamus during Quiescent and Activated  
756 States. *Journal of Neuroscience* **25**:10990–11002. doi:10.1523/JNEUROSCI.3229-05.2005
- 757 Allen CB, Celikel T, Feldman DE. 2003. Long-term depression induced by sensory deprivation during  
758 cortical map plasticity in vivo. *Nature neuroscience* **6**:291–9. doi:10.1038/nn1012
- 759 Ananthanarayanan R, Esser SK, Simon HD, Modha DS. 2009. The cat is out of the bag Proceedings of the  
760 Conference on High Performance Computing Networking, Storage and Analysis - SC '09. New  
761 York, New York, USA: ACM Press. p. 1. doi:10.1145/1654059.1654124
- 762 Arkhipov A, Gouwens NW, Billeh YN, Gratiy S, Iyer R, Wei Z, Xu Z, Abbasi-Asl R, Berg J, Buice M,  
763 Cain N, da Costa N, de Vries S, Denman D, Durand S, Feng D, Jarsky T, Lecoq J, Lee B, Li L,  
764 Mihalas S, Ocker GK, Olsen SR, Reid RC, Soler-Llavina G, Sorensen SA, Wang Q, Waters J,  
765 Scanziani M, Koch C. 2018. Visual physiology of the layer 4 cortical circuit in silico. *PLOS*  
766 *Computational Biology* **14**:e1006535. doi:10.1371/journal.pcbi.1006535
- 767 Armstrong-James M, Callahan CA. 1991. Thalamo-cortical processing of vibrissal information in the rat.  
768 II. Spatiotemporal convergence in the thalamic ventroposterior medial nucleus (VPM) and its  
769 relevance to generation of receptive fields of S1 cortical “Barrel” neurones. *Journal of*  
770 *Comparative Neurology* **303**:211–224. doi:10.1002/cne.903030204
- 771 Armstrong-James M, Fox K, Das-Gupta A. 1992. Flow of excitation within rat barrel cortex on striking a  
772 single vibrissa. *Journal of Neurophysiology* **68**:1345–1358. doi:10.1152/jn.1992.68.4.1345
- 773 Arnold PB, Li CX, Waters RS. 2001. Thalamocortical arbors extend beyond single cortical barrels: an  
774 in vivo intracellular tracing study in rat. *Exp Brain Res* **136**:152–168. doi:10.1007/s002210000570
- 775 Azarfar A, Calcini N, Huang C, Zeldenrust F, Celikel T. 2018a. Neural coding: A single neuron’s  
776 perspective. *Neuroscience & Biobehavioral Reviews* **94**:238–247.  
777 doi:10.1016/j.neubiorev.2018.09.007
- 778 Azarfar A, Zhang Y, Alishbayli A, Miceli S, Kepser L, van der Wielen D, van de Moosdijk M, Homberg  
779 J, Schubert D, Proville R, Celikel T. 2018b. An open-source high-speed infrared videography  
780 database to study the principles of active sensing in freely navigating rodents. *Gigascience* **7**.  
781 doi:10.1093/gigascience/giy134
- 782 Banerjee A, González-Rueda A, Sampaio-Baptista C, Paulsen O, Rodríguez-Moreno A. 2014. Distinct  
783 mechanisms of spike timing-dependent LTD at vertical and horizontal inputs onto L2/3 pyramidal  
784 neurons in mouse barrel cortex. *Physiol Rep* **2**:e00271. doi:10.1002/phy2.271
- 785 Bassett DS, Bullmore E. 2006. Small-World Brain Networks. *The Neuroscientist* **12**:512–523.  
786 doi:10.1177/1073858406293182
- 787 Beierlein M, Gibson JR, Connors BW. 2003. Two Dynamically Distinct Inhibitory Networks in Layer 4  
788 of the Neocortex. *Journal of Neurophysiology* **90**:2987–3000. doi:10.1152/jn.00283.2003
- 789 Bender KJ, Allen CB, Bender VA, Feldman DE. 2006. Synaptic Basis for Whisker Deprivation-Induced  
790 Synaptic Depression in Rat Somatosensory Cortex. *J Neurosci* **26**:4155–4165.  
791 doi:10.1523/JNEUROSCI.0175-06.2006
- 792 Bernardi D, Doron G, Brecht M, Lindner B. 2020. A network model of the barrel cortex combined with a  
793 differentiator detector reproduces features of the behavioral response to single-neuron  
794 stimulation. *bioRxiv* 2020.03.30.016261. doi:10.1101/2020.03.30.016261
- 795 Billeh YN, Cai B, Gratiy SL, Dai K, Iyer R, Gouwens NW, Abbasi-Asl R, Jia X, Siegle JH, Olsen SR,  
796 Koch C, Mihalas S, Arkhipov A. 2019. Systematic Integration of Structural and Functional Data  
797 into Multi-Scale Models of Mouse Primary Visual Cortex. *bioRxiv* 662189. doi:10.1101/662189
- 798 Blatow M, Rozov A, Katona I, Hormuzdi SG, Meyer AH, Whittington MA, Caputi A, Monyer H. 2003.  
799 A Novel Network of Multipolar Bursting Interneurons Generates Theta Frequency Oscillations in  
800 Neocortex. *Neuron* **38**:805–817. doi:10.1016/S0896-6273(03)00300-3
- 801 Brecht M, Roth A, Sakmann B. 2003. Dynamic receptive fields of reconstructed pyramidal cells in layers  
802 3 and 2 of rat somatosensory barrel cortex. *The Journal of physiology* **553**:243–65.  
803 doi:10.1113/jphysiol.2003.044222

- 804 Brecht M, Sakmann B. 2002. -Dynamic representation of whisker deflection by synaptic potentials in  
805 spiny stellate and pyramidal cells in the barrels and septa of layer 4 rat somatosensory cortex. *J*  
806 *Physiol* **543**:49–70. doi:10.1113/jphysiol.2002.018465
- 807 Brunel N. 2000. Dynamics of Sparsely Connected Networks of Excitatory and Inhibitory Spiking  
808 Neurons. *Journal of Computational Neuroscience* **8**.
- 809 Caputi A, Rozov A, Blatow M, Monyer H. 2009. Two calretinin-positive GABAergic cell types in layer  
810 2/3 of the mouse neocortex provide different forms of inhibition. *Cereb Cortex* **19**:1345–1359.  
811 doi:10.1093/cercor/bhn175
- 812 Celikel T, Szostak VA, Feldman DE. 2004. Modulation of spike timing by sensory deprivation during  
813 induction of cortical map plasticity. *Nature neuroscience* **7**:534–541. doi:10.1038/nn1222
- 814 Chariker L, Shapley R, Young LS. 2016. Orientation selectivity from very sparse LGN inputs in a  
815 comprehensive model of macaque V1 cortex. *Journal of Neuroscience* **36**:12368–12384.  
816 doi:10.1523/JNEUROSCI.2603-16.2016
- 817 Chichilnisky EJ. 2001. A simple white noise analysis of neuronal light. *Network: Computation in Neural*  
818 *Systems* **12**:199–213.
- 819 Chu Y, Fei J, Hou S. 2020. Adaptive Global Sliding-Mode Control for Dynamic Systems Using Double  
820 Hidden Layer Recurrent Neural Network Structure. *IEEE Transactions on Neural Networks and*  
821 *Learning Systems* **31**:1297–1309. doi:10.1109/TNNLS.2019.2919676
- 822 Clem RL, Celikel T, Barth AL. 2008. Ongoing in vivo experience triggers synaptic metaplasticity in the  
823 neocortex. *Science* **319**:101–4. doi:10.1126/science.1143808
- 824 Condylis C, Lowet E, Ni J, Bistrong K, Ouellette T, Josephs N, Chen JL. 2020. Context-Dependent  
825 Sensory Processing across Primary and Secondary Somatosensory Cortex. *Neuron* **106**:515-  
826 525.e5. doi:10.1016/j.neuron.2020.02.004
- 827 Crochet S, Poulet JFA, Kremer Y, Petersen CCH. 2011. Synaptic Mechanisms Underlying Sparse Coding  
828 of Active Touch. *Neuron* **69**:1160–1175. doi:10.1016/j.neuron.2011.02.022
- 829 da Silva Lantyer A, Calcini N, Bijlsma A, Kole K, Emmelkamp M, Peeters M, Scheenen WJJ, Zeldenrust  
830 F, Celikel T. 2018. A databank for intracellular electrophysiological mapping of the adult  
831 somatosensory cortex. *GigaScience* **7**:1–9. doi:10.1093/gigascience/giy147
- 832 De Kock CPJ, Bruno RM, Spors H, Sakmann B. 2007. Layer- and cell-type-specific suprathreshold  
833 stimulus representation in rat primary somatosensory cortex. *The Journal of Physiology* **581**:139–  
834 154. doi:10.1113/jphysiol.2006.124321
- 835 Denk W, Detwiler PB. 1999. Optical recording of light-evoked calcium signals in the functionally intact  
836 retina. *Proceedings of the National Academy of Sciences* **96**:7035–7040.  
837 doi:10.1073/pnas.96.12.7035
- 838 Diamond ME, Armstrong-James M, Ebner FF. 1992. Somatic sensory responses in the rostral sector of  
839 the posterior group (POm) and in the ventral posterior medial nucleus (VPM) of the rat thalamus.  
840 *Journal of Comparative Neurology* **318**:462–476. doi:10.1002/cne.903180410
- 841 Doi E, Gauthier JL, Field GD, Shlens J, Sher A, Greschner M, Machado T a, Jepson LH, Mathieson K,  
842 Gunning DE, Litke AM, Paninski L, Chichilnisky EJ, Simoncelli EP. 2012. Efficient coding of  
843 spatial information in the primate retina. *The Journal of Neuroscience* **32**:16256–64.  
844 doi:10.1523/JNEUROSCI.4036-12.2012
- 845 Douglas RJ, Martin KAC. 2007. Recurrent neuronal circuits in the neocortex. *Current Biology* **17**:R496–  
846 R500. doi:10.1016/j.cub.2007.04.024
- 847 Douglas RJ, Martin KAC. 2004. Neuronal circuits of the neocortex. *Annu Rev Neurosci* **27**:419–451.  
848 doi:10.1146/annurev.neuro.27.070203.144152
- 849 Dudai A, Yayon N, Lerner V, Tasaka G, Deitcher Y, Gorfine K, Niederhoffer N, Mizrahi A, Soreq H,  
850 London M. 2020. Barrel cortex VIP/ChAT interneurons suppress sensory responses in vivo.  
851 *PLoS Biology* **18**:e3000613. doi:10.1371/journal.pbio.3000613
- 852 Edelman GM, Gally J. 2001. Degeneracy and Complexity in Biological Systems. *Proceedings of the*  
853 *National Academy of Sciences* **98**:13763–13768.

- 854 Egger V, Nevian T, Bruno RM. 2008. Subcolumnar Dendritic and Axonal Organization of Spiny Stellate  
855 and Star Pyramid Neurons within a Barrel in Rat Somatosensory Cortex. *Cereb Cortex* **18**:876–  
856 889. doi:10.1093/cercor/bhm126
- 857 Einevoll GT, Destexhe A, Diesmann M, Grün S, Jirsa V, de Kamps M, Migliore M, Ness TV, Plesser HE,  
858 Schürmann F. 2019. The Scientific Case for Brain Simulations. *Neuron* **102**:735–744.  
859 doi:10.1016/j.neuron.2019.03.027
- 860 Eliasmith C, Trujillo O. 2014. The use and abuse of large-scale brain models. *Current Opinion in*  
861 *Neurobiology* **25**:1–6. doi:10.1016/j.conb.2013.09.009
- 862 Fan X, Markram H. 2019. A Brief History of Simulation Neuroscience. *Front Neuroinform* **13**:32.  
863 doi:10.3389/fninf.2019.00032
- 864 Feldman DE, Brecht M. 2005. Map plasticity in somatosensory cortex. *Science* **310**:810–5.  
865 doi:10.1126/science.1115807
- 866 Feldmeyer D, Lübke J, Sakmann B. 2006. Efficacy and connectivity of intracolumnar pairs of layer 2/3  
867 pyramidal cells in the barrel cortex of juvenile rats: Layer 2/3 pyramidal cell synapses. *The*  
868 *Journal of Physiology* **575**:583–602. doi:10.1113/jphysiol.2006.105106
- 869 Feldmeyer D, Lübke J, Silver RA, Sakmann B. 2002. Synaptic connections between layer 4 spiny  
870 neurone- layer 2/3 pyramidal cell pairs in juvenile rat barrel cortex: physiology and anatomy of  
871 interlaminar signalling within a cortical column. *The Journal of Physiology* **538**:803.  
872 doi:10.1113/jphysiol.2001.012959
- 873 Field GD, Chichilnisky EJ. 2007. Information Processing in the Primate Retina: Circuitry and Coding.  
874 *Annual Review of Neuroscience* **30**:1–30. doi:10.1146/annurev.neuro.30.051606.094252
- 875 Fino E, Yuste R. 2011. Dense inhibitory connectivity in neocortex. *Neuron* **69**:1188–203.  
876 doi:10.1016/j.neuron.2011.02.025
- 877 Foeller E, Celikel T, Feldman DE. 2005. Inhibitory sharpening of receptive fields contributes to whisker  
878 map plasticity in rat somatosensory cortex. *Journal of neurophysiology* **94**:4387–4400.  
879 doi:10.1152/jn.00553.2005.
- 880 Fox K. 2018. Deconstructing the Cortical Column in the Barrel Cortex. *Neuroscience, Barrel Cortex*  
881 *Function* **368**:17–28. doi:10.1016/j.neuroscience.2017.07.034
- 882 Furuta T, Deschênes M, Kaneko T. 2011. Anisotropic Distribution of Thalamocortical Boutons in  
883 Barrels. *J Neurosci* **31**:6432–6439. doi:10.1523/JNEUROSCI.6154-10.2011
- 884 Gentet LJ, Avermann M, Matyas F, Staiger JF, Petersen CCH. 2010. Membrane Potential Dynamics of  
885 GABAergic Neurons in the Barrel Cortex of Behaving Mice. *Neuron* **65**:422–435.  
886 doi:10.1016/j.neuron.2010.01.006
- 887 Gentet LJ, Kremer Y, Taniguchi H, Huang ZJ, Staiger JF, Petersen CCH. 2012. Unique functional  
888 properties of somatostatin-expressing GABAergic neurons in mouse barrel cortex. *Nat Neurosci*  
889 **15**:607–612. doi:10.1038/nn.3051
- 890 Gerstner W, Kistler WM. 2002. Spiking Neuron Models: Single Neurons, Populations, Plasticity.  
891 Cambridge University Press.
- 892 Guizar-Sicairos M, Thurman ST, Fienup JR. 2008. Efficient subpixel image registration algorithms.  
893 *Optics Letters* **33**:156–158.
- 894 Haas JS, Nowotny T, Abarbanel HDI. 2006. Spike-timing-dependent plasticity of inhibitory synapses in  
895 the entorhinal cortex. *J Neurophysiol* **96**:3305–3313. doi:10.1152/jn.00551.2006
- 896 Hardingham NR, Gould T, Fox K. 2011. Anatomical and sensory experiential determinants of synaptic  
897 plasticity in layer 2/3 pyramidal neurons of mouse barrel cortex. *Journal of Comparative*  
898 *Neurology* **519**:2090–2124. doi:10.1002/cne.22583
- 899 Heckbert PS, editor. 1994. Graphics Gems IV. USA: Academic Press Professional, Inc.
- 900 Helmstaedter M, Briggman KL, Turaga SC, Jain V, Seung HS, Denk W. 2013. Connectomic  
901 reconstruction of the inner plexiform layer in the mouse retina. *Nature* **500**:168–74.  
902 doi:10.1038/nature12346

- 903 Helmstaedter M, Staiger JF, Sakmann B, Feldmeyer D. 2008. Efficient Recruitment of Layer 2/3  
904 Interneurons by Layer 4 Input in Single Columns of Rat Somatosensory Cortex. *Journal of*  
905 *Neuroscience* **28**:8273–8284. doi:10.1523/JNEUROSCI.5701-07.2008
- 906 Hodge RD, D’Ercole AJ, O’Kusky JR. 2005. Increased expression of insulin-like growth factor-I (IGF-I)  
907 during embryonic development produces neocortical overgrowth with differentially greater  
908 effects on specific cytoarchitectonic areas and cortical layers. *Developmental Brain Research*  
909 **154**:227–237. doi:10.1016/j.devbrainres.2004.10.016
- 910 Holmgren C, Harkany T, Svennenfors B, Zilberter Y. 2003. Pyramidal cell communication within local  
911 networks in layer 2/3 of rat neocortex. *The Journal of Physiology* **551**:139–153.  
912 doi:10.1113/jphysiol.2003.044784
- 913 Hopfield JJ. 1982. Neural networks and physical systems with emergent collective computational  
914 abilities. *Proceedings of the National Academy of Sciences* **79**:2554–2558.
- 915 Huang C, Englitz B, Reznik A, Zeldenrust F, Celikel T. 2020. Information transfer and recovery for the  
916 sense of touch. *bioRxiv*. doi:10.1101/2020.12.08.415729
- 917 Huang C, Resnik A, Celikel T, Englitz B. 2016. Adaptive Spike Threshold Enables Robust and  
918 Temporally Precise Neuronal Encoding. *PLoS Computational Biology* **12**.  
919 doi:10.1371/journal.pcbi.1004984
- 920 Irintchev A, Rollenhagen A, Troncoso E, Kiss JZ, Schachner M. 2005. Structural and Functional  
921 Aberrations in the Cerebral Cortex of Tenascin-C Deficient Mice. *Cereb Cortex* **15**:950–962.  
922 doi:10.1093/cercor/bhh195
- 923 Izhikevich EM. 2004. Which model to use for cortical spiking neurons? *IEEE Transactions on Neural*  
924 *Networks* **15**:1063–1070.
- 925 Izhikevich EM. 2003. Simple Model of Spiking Neurons. *IEEE Transactions on Neural Networks*  
926 **14**:1572–1596. doi:10.1109/TNN.2003.820440
- 927 Izhikevich EM, Edelman GM. 2008. Large-scale model of mammalian thalamocortical systems.  
928 *Proceedings of the National Academy of Sciences* **105**:3593–3598.
- 929 Jolivet R, Lewis TJ, Gerstner W. 2004. Generalized integrate-and-fire models of neuronal activity  
930 approximate spike trains of a detailed model to a high degree of accuracy. *Journal of*  
931 *neurophysiology* **92**:959–76. doi:10.1152/jn.00190.2004
- 932 Kapfer C, Glickfeld LL, Atallah BV, Scanziani M. 2007. Supralinear increase of recurrent inhibition  
933 during sparse activity in the somatosensory cortex. *Nature Neuroscience* **10**:743–753.  
934 doi:10.1038/nn1909
- 935 Kato S, Kaplan HS, Yemini E, Zimmer M, Skora S, Lindsay TH, Yemini E, Lockery S, Zimmer M. 2015.  
936 Global Brain Dynamics Embed the Motor Command Sequence of *Caenorhabditis elegans*. *Cell*  
937 **1–14**. doi:10.1016/j.cell.2015.09.034
- 938 Kawaguchi Y, Kubota Y. 1997. GABAergic cell subtypes and their synaptic connections in rat frontal  
939 cortex. *Cereb Cortex* **7**:476–486. doi:10.1093/cercor/7.6.476
- 940 Keat J, Reinagel P, Clay Reid R, Meister M. 2001. Predicting Every Spike: A Model for the Responses of  
941 Visual Neurons. *Neuron* **30**:803–817.
- 942 Kerr JND, Kock CPJ de, Greenberg DS, Bruno RM, Sakmann B, Helmchen F. 2007. Spatial Organization  
943 of Neuronal Population Responses in Layer 2/3 of Rat Barrel Cortex. *J Neurosci* **27**:13316–  
944 13328. doi:10.1523/JNEUROSCI.2210-07.2007
- 945 Koelbl C, Helmstaedter M, Lübke J, Feldmeyer D. 2015. A Barrel-Related Interneuron in Layer 4 of Rat  
946 Somatosensory Cortex with a High Intrabarrel Connectivity. *Cereb Cortex* **25**:713–725.  
947 doi:10.1093/cercor/bht263
- 948 Kole K, Celikel T. 2019. Neocortical Microdissection at Columnar and Laminar Resolution for Molecular  
949 Interrogation. *Current Protocols in Neuroscience* **86**:e55. doi:10.1002/cpns.55
- 950 Kole K, Komuro Y, Provaznik J, Pistollic J, Benes V, Tiesinga P, Celikel T. 2017. Transcriptional  
951 mapping of the primary somatosensory cortex upon sensory deprivation. *GigaScience* **6**:1–6.  
952 doi:10.1093/gigascience/gix081

- 953 Kole K, Lindeboom RGH, Baltissen MPA, Jansen PWTC, Vermeulen M, Tiesinga P, Celikel T. 2018a.  
954 Proteomic landscape of the primary somatosensory cortex upon sensory deprivation. *GigaScience*  
955 **6**:1–10. doi:10.1093/gigascience/gix082
- 956 Kole K, Scheenen W, Tiesinga P, Celikel T. 2018b. Cellular diversity of the somatosensory cortical map  
957 plasticity. *Neuroscience & Biobehavioral Reviews* **84**:100–115.  
958 doi:10.1016/j.neubiorev.2017.11.015
- 959 Kole K, Zhang Y, Jansen EJR, Brouns T, Bijlsma A, Calcini N, Yan X, Lantyer A da S, Celikel T. 2020.  
960 Assessing the utility of Magneto to control neuronal excitability in the somatosensory cortex.  
961 *Nature Neuroscience* **23**:1044–1046. doi:10.1038/s41593-019-0474-4
- 962 Kole MHP, Brette R. 2018. The electrical significance of axon location diversity. *Current Opinion in*  
963 *Neurobiology* **51**:52–59. doi:10.1016/j.conb.2018.02.016
- 964 Kwegyir-Afful EE, Bruno RM, Simons DJ, Keller A. 2005. The Role of Thalamic Inputs in Surround  
965 Receptive Fields of Barrel Neurons. *J Neurosci* **25**:5926–5934. doi:10.1523/JNEUROSCI.1360-  
966 05.2005
- 967 Li PH, Gauthier JL, Schiff M, Sher A, Ahn D, Field GD, Greschner M, Callaway EM, Litke AM,  
968 Chichilnisky EJ. 2015. Anatomical Identification of Extracellularly Recorded Cells in Large-  
969 Scale Multielectrode Recordings. *The Journal of Neuroscience* **35**:4663–4675.  
970 doi:10.1523/JNEUROSCI.3675-14.2015
- 971 Lu J, Li C, Zhao J-P, Poo M, Zhang X. 2007. Spike-Timing-Dependent Plasticity of Neocortical  
972 Excitatory Synapses on Inhibitory Interneurons Depends on Target Cell Type. *J Neurosci*  
973 **27**:9711–9720. doi:10.1523/JNEUROSCI.2513-07.2007
- 974 Lübke J, Roth A, Feldmeyer D, Sakmann B. 2003. Morphometric Analysis of the Columnar Innervation  
975 Domain of Neurons Connecting Layer 4 and Layer 2/3 of Juvenile Rat Barrel Cortex. *Cereb*  
976 *Cortex* **13**:1051–1063. doi:10.1093/cercor/13.10.1051
- 977 Lyck L, Krøigård T, Finsen B. 2007. Unbiased cell quantification reveals a continued increase in the  
978 number of neocortical neurones during early post-natal development in mice. *European Journal*  
979 *of Neuroscience* **26**:1749–1764. doi:10.1111/j.1460-9568.2007.05763.x
- 980 Ma D, Descarries L, Micheva KD, Lepage Y, Julien J-P, Doucet G. 1999. Severe neuronal losses with age  
981 in the parietal cortex and ventrobasal thalamus of mice transgenic for the human NF-L  
982 neurofilament protein. *Journal of Comparative Neurology* **406**:433–448.  
983 doi:10.1002/(SICI)1096-9861(19990419)406:4<433::AID-CNE2>3.0.CO;2-3
- 984 Marder E, Goaillard J-M. 2006. Variability, compensation and homeostasis in neuron and network  
985 function. *Nature Reviews* **7**:563–574. doi:10.1038/nrn1949
- 986 Marder E, Taylor AL. 2011. Multiple models to capture the variability in biological neurons and  
987 networks. *Nature neuroscience* **14**:133–8. doi:10.1038/nn.2735
- 988 Markram H. 2006. The blue brain project. *Nature reviews Neuroscience* **7**:153–160. doi:10.1038/nrn1848
- 989 Markram H, Muller E, Ramaswamy S, Reimann MW, Abdellah M, Sanchez CA, Ailamaki A, Alonso-  
990 Nanclares L, Antille N, Arsever S, Kahou GAA, Berger TK, Bilgili A, Buncic N, Chalimourda A,  
991 Chindemi G, Courcol J-D, Delalondre F, Delattre V, Druckmann S, Dumusc R, Dynes J,  
992 Eilemann S, Gal E, Gevaert ME, Ghobril J-P, Gidon A, Graham JW, Gupta A, Haenel V, Hay E,  
993 Heinis T, Hernando JB, Hines M, Kanari L, Keller D, Kenyon J, Khazen G, Kim Y, King JG,  
994 Kisvarday Z, Kumbhar P, Lasserre S, Le Bé J-V, Magalhães BRC, Merchán-Pérez A, Meystre J,  
995 Morrice BR, Muller J, Muñoz-Céspedes A, Muralidhar S, Muthurasa K, Nachbaur D, Newton  
996 TH, Nolte M, Ovcharenko A, Palacios J, Pastor L, Perin R, Ranjan R, Riachi I, Rodríguez J-R,  
997 Riquelme JL, Rössert C, Sfyarakis K, Shi Y, Shillcock JC, Silberberg G, Silva R, Tauheed F,  
998 Telefont M, Toledo-Rodriguez M, Tränkler T, Van Geit W, Díaz JV, Walker R, Wang Y,  
999 Zaninetta SM, DeFelipe J, Hill SL, Segev I, Schürmann F. 2015. Reconstruction and Simulation  
1000 of Neocortical Microcircuitry. *Cell* **163**:456–492. doi:10.1016/j.cell.2015.09.029
- 1001 Markram H, Toledo-rodriguez M, Wang Y, Gupta A, Silberberg G, Wu C. 2004. Interneurons of the  
1002 Neocortical Inhibitory System. *Nature reviews Neuroscience* **5**:793–807. doi:10.1038/nrn1519

- 1003 Marre O, Amodei D, Deshmukh N, Sadeghi K, Soo F, Holy TE, Berry MJ. 2012. Mapping a complete  
1004 neural population in the retina. *The Journal of Neuroscience* **32**:14859–73.  
1005 doi:10.1523/JNEUROSCI.0723-12.2012
- 1006 Meyer F. 1994. Topographic distance and watershed lines. *Signal Processing, Mathematical Morphology*  
1007 and its Applications to Signal Processing **38**:113–125. doi:10.1016/0165-1684(94)90060-4
- 1008 Meyer HS, Egger R, Guest JM, Foerster R, Reissl S, Oberlaender M. 2013. Cellular organization of  
1009 cortical barrel columns is whisker-specific. *Proc Natl Acad Sci U S A* **110**:19113–19118.  
1010 doi:10.1073/pnas.1312691110
- 1011 Meyer HS, Wimmer VC, Oberlaender M, de Kock CPJ, Sakmann B, Helmstaedter M. 2010. Number and  
1012 Laminar Distribution of Neurons in a Thalamocortical Projection Column of Rat Vibrissal  
1013 Cortex. *Cereb Cortex* **20**:2277–2286. doi:10.1093/cercor/bhq067
- 1014 Oberlaender M, de Kock CPJ, Bruno RM, Ramirez A, Meyer HS, Dercksen VJ, Helmstaedter M,  
1015 Sakmann B. 2012. Cell Type-Specific Three-Dimensional Structure of Thalamocortical Circuits  
1016 in a Column of Rat Vibrissal Cortex. *Cereb Cortex* **22**:2375–2391. doi:10.1093/cercor/bhr317
- 1017 Oberlaender M, Dercksen VJ, Egger R, Gensel M, Sakmann B, Hege H-C. 2009. Automated three-  
1018 dimensional detection and counting of neuron somata. *Journal of Neuroscience Methods*  
1019 **180**:147–160. doi:10.1016/j.jneumeth.2009.03.008
- 1020 O’Connor DH, Huber D, Svoboda K. 2009. Reverse engineering the mouse brain. *Nature* **461**:923–929.  
1021 doi:10.1038/nature08539
- 1022 O’Connor DH, Peron SP, Huber D, Svoboda K. 2010. Neural Activity in Barrel Cortex Underlying  
1023 Vibrissa-Based Object Localization in Mice. *Neuron* **67**:1048–1061.  
1024 doi:10.1016/j.neuron.2010.08.026
- 1025 Otsu N. 1979. A Threshold Selection Method from Gray-Level Histograms. *IEEE Transactions on*  
1026 *Systems, Man, and Cybernetics* **9**:62–66. doi:10.1109/TSMC.1979.4310076
- 1027 Packer AM, Yuste R. 2011. Dense, Unspecific Connectivity of Neocortical Parvalbumin-Positive  
1028 Interneurons: A Canonical Microcircuit for Inhibition? *The Journal of Neuroscience* **31**:13260–  
1029 13271. doi:10.1523/JNEUROSCI.3131-11.2011
- 1030 Paninski L. 2004. Maximum likelihood estimation of cascade point-process neural encoding models.  
1031 *Network: Computation in Neural Systems* **15**:243–262. doi:10.1088/0954-898X/15/4/002
- 1032 Peng H, Ruan Z, Long F, Simpson JH, Myers EW. 2010. V3D enables real-time 3D visualization and  
1033 quantitative analysis of large-scale biological image data sets. *Nature biotechnology* **28**:348.  
1034 doi:10.1038/nbt.1612
- 1035 Peron S, Pancholi R, Voelcker B, Wittenbach JD, Ólafsdóttir HF, Freeman J, Svoboda K. 2020. Recurrent  
1036 interactions in local cortical circuits. *Nature* 1–4. doi:10.1038/s41586-020-2062-x
- 1037 Peron SP, Freeman J, Iyer V, Guo C, Svoboda K. 2015. A Cellular Resolution Map of Barrel Cortex  
1038 Activity during Tactile Behavior. *Neuron* **86**:783–799. doi:10.1016/j.neuron.2015.03.027
- 1039 Petersen CCH. 2007. The Functional Organization of the Barrel Cortex. *Neuron* **56**:339–355.  
1040 doi:10.1016/j.neuron.2007.09.017
- 1041 Petersen CCH, Sakmann B. 2001. Functionally Independent Columns of Rat Somatosensory Barrel  
1042 Cortex Revealed with Voltage-Sensitive Dye Imaging. *J Neurosci* **21**:8435–8446.  
1043 doi:10.1523/JNEUROSCI.21-21-08435.2001
- 1044 Petersen RS, Brambilla M, Bale MR, Alenda A, Panzeri S, Montemurro MA, Maravall M. 2008. Diverse  
1045 and Temporally Precise Kinetic Feature Selectivity in the VPm Thalamic Nucleus. *Neuron*  
1046 **60**:890–903. doi:DOI 10.1016/j.neuron.2008.09.041
- 1047 Phoka E, Wildie M, Schultz SR, Barahona M. 2012. Sensory experience modifies spontaneous state  
1048 dynamics in a large-scale barrel cortical model. *Journal of Computational Neuroscience* **33**:323–  
1049 339. doi:10.1007/s10827-012-0388-6
- 1050 Pillow JW, Shlens J, Paninski L, Sher A, Litke AM, Chichilnisky EJ, Simoncelli EP. 2008. Spatio-  
1051 temporal correlations and visual signalling in a complete neuronal population. *Nature* **454**:995–9.  
1052 doi:10.1038/nature07140



- 1053 Porter JT, Cauli B, Staiger JF, Lambolez B, Rossier J, Audinat E. 1998. Properties of bipolar VIPergic  
1054 interneurons and their excitation by pyramidal neurons in the rat neocortex. *European Journal of*  
1055 *Neuroscience* **10**:3617–3628. doi:10.1046/j.1460-9568.1998.00367.x
- 1056 Potjans TC, Diesmann M. 2014. The cell-type specific cortical microcircuit: Relating structure and  
1057 activity in a full-scale spiking network model. *Cerebral Cortex* **24**:785–806.  
1058 doi:10.1093/cercor/bhs358
- 1059 Prinz AA, Bucher D, Marder E. 2004. Similar network activity from disparate circuit parameters. *Nature*  
1060 *neuroscience* **7**:1345–1352. doi:10.1038/nn1352
- 1061 Reich DS, Victor JD, Knight BW. 1998. The power ratio and the interval map: spiking models and  
1062 extracellular recordings. *The Journal of Neuroscience* **18**:10090–10104.
- 1063 Reimann MW, Anastassiou CA, Perin R, Hill SL, Markram H, Koch C. 2013. A biophysically detailed  
1064 model of neocortical local field potentials predicts the critical role of active membrane currents.  
1065 *Neuron* **79**:375–390. doi:10.1016/j.neuron.2013.05.023
- 1066 Rosenblatt F. 1958. The perceptron: A probabilistic model for information storage and organization in the  
1067 brain. *Psychological Review* **65**:386–408.
- 1068 Rubin J, Terman D. 2004. High Frequency Stimulation of the Subthalamic Nucleus Eliminates  
1069 Pathological Thalamic Rhythmicity in a Computational Model. *Journal of Computational*  
1070 *Neuroscience* **16**:211–235.
- 1071 Schmidt M, Bakker R, Hilgetag CC, Diesmann M, van Albada SJ. 2018a. Multi-scale account of the  
1072 network structure of macaque visual cortex. *Brain Structure and Function* **223**:1409–1435.  
1073 doi:10.1007/s00429-017-1554-4
- 1074 Schmidt M, Bakker R, Shen K, Bezgin G, Diesmann M, Albada SJ van. 2018b. A multi-scale layer-  
1075 resolved spiking network model of resting-state dynamics in macaque visual cortical areas. *PLOS*  
1076 *Computational Biology* **14**:e1006359. doi:10.1371/journal.pcbi.1006359
- 1077 Schuecker J, Schmidt M, Albada SJ van, Diesmann M, Helias M. 2017. Fundamental Activity Constraints  
1078 Lead to Specific Interpretations of the Connectome. *PLOS Computational Biology* **13**:e1005179.  
1079 doi:10.1371/journal.pcbi.1005179
- 1080 Sermet BS, Truschow P, Feyerabend M, Mayrhofer JM, Oram TB, Yizhar O, Staiger JF, Petersen CC.  
1081 2019. Pathway-, layer- and cell-type-specific thalamic input to mouse barrel cortex. *eLife*  
1082 **8**:e52665. doi:10.7554/eLife.52665
- 1083 Seung HS, Yuste R. 2012. Neural Networks In: Kandel ER, Schwartz JH, Jessell TM, Siegelbaum SA,  
1084 Hudspeth AJ, editors. Principles of Neural Science. McGraw-Hill. pp. 1581–1600.
- 1085 Sharp T, Petersen R, Furber S. 2014. Real-time million-synapse simulation of rat barrel cortex. *Frontiers*  
1086 *in Neuroscience* **8**:1–9. doi:10.3389/fnins.2014.00131
- 1087 Simons DJ, Carvell GE. 1989. Thalamocortical response transformation in the rat vibrissa/barrel system.  
1088 *J Neurophysiol* **61**:311–330. doi:10.1152/jn.1989.61.2.311
- 1089 Sompolinsky H, Crisanti A, Sommers HJ. 1988. Chaos in Random Neural Networks. *Physical Review*  
1090 *Letters* **61**:259–262.
- 1091 Staiger JF, Flaggmeyer I, Schubert D, Zilles K, Kötter R, Luhmann HJ. 2004. Functional Diversity of  
1092 Layer IV Spiny Neurons in Rat Somatosensory Cortex: Quantitative Morphology of  
1093 Electrophysiologically Characterized and Biocytin Labeled Cells. *Cereb Cortex* **14**:690–701.  
1094 doi:10.1093/cercor/bhh029
- 1095 Stam CJ, Reijneveld JC. 2007. Graph theoretical analysis of complex networks in the brain. *Nonlinear*  
1096 *biomedical physics* **1**:3. doi:10.1186/1753-4631-1-3
- 1097 Sudhakar SK, Hong S, Raikov I, Publio R, Lang C, Close T, Guo D, Negrello M, De Schutter E. 2017.  
1098 Spatiotemporal network coding of physiological mossy fiber inputs by the cerebellar granular  
1099 layer, PLoS Computational Biology. doi:10.1371/journal.pcbi.1005754
- 1100 Sun Q-Q, Huguenard JR, Prince DA. 2006. Barrel Cortex Microcircuits: Thalamocortical Feedforward  
1101 Inhibition in Spiny Stellate Cells Is Mediated by a Small Number of Fast-Spiking Interneurons. *J*  
1102 *Neurosci* **26**:1219–1230. doi:10.1523/JNEUROSCI.4727-04.2006

- 1103 Swadlow HA. 2003. Fast-spike Interneurons and Feedforward Inhibition in Awake Sensory Neocortex.  
1104 *Cereb Cortex* **13**:25–32. doi:10.1093/cercor/13.1.25
- 1105 Swadlow HA. 1995. Influence of VPM afferents on putative inhibitory interneurons in S1 of the awake  
1106 rabbit: evidence from cross-correlation, microstimulation, and latencies to peripheral sensory  
1107 stimulation. *Journal of Neurophysiology* **73**:1584–1599. doi:10.1152/jn.1995.73.4.1584
- 1108 Tamás G, Andrea Lőrincz AS, Szabadics J. 2003. Identified Sources and Targets of Slow Inhibition in the  
1109 Neocortex. *Science* **299**:1902–1905. doi:10.1126/science.1082053
- 1110 Thomson AM, Lamy C. 2007. Functional maps of neocortical local circuitry. *Front Neurosci* **1**.  
1111 doi:10.3389/neuro.01.1.1.002.2007
- 1112 Tomsett RJ, Ainsworth M, Thiele A, Sanayei M, Chen X, Gieselmann MA, Whittington MA,  
1113 Cunningham MO, Kaiser M. 2015. Virtual Electrode Recording Tool for EXtracellular potentials  
1114 (VERTEX): comparing multi-electrode recordings from simulated and biological mammalian  
1115 cortical tissue. *Brain Structure and Function* **220**:2333–2353. doi:10.1007/s00429-014-0793-x
- 1116 Tort AB, Rotstein HG, Dugladze T, Gloveli T, Kopell NJ. 2007. On the formation of gamma-coherent  
1117 cell assemblies by oriens lacunosum-moleculare interneurons in the hippocampus. *Proceedings of*  
1118 *the National Academy of Sciences* **104**:13490–13495.
- 1119 Traub RD, Contreras D, Cunningham MO, Murray H, LeBeau FEN, Roopun A, Bibbig A, Bryan Wilent  
1120 W, Higley MJ, Whittington M a, Wilent WB, Higley MJ, Whittington M a. 2005. Single-Column  
1121 Thalamocortical Network Model Exhibiting Gamma Oscillations, Sleep Spindles, and  
1122 Epileptogenic Bursts. *Journal of Neurophysiology* **93**:194–232. doi:10.1152/jn.00983.2004
- 1123 Truccolo W, Eden UT, Fellows MR, Donoghue JP, Brown EN. 2005. A point process framework for  
1124 relating neural spiking activity to spiking history, neural ensemble, and extrinsic covariate effects.  
1125 *Journal of Neurophysiology* **93**:1074–89. doi:10.1152/jn.00697.2004
- 1126 Tsai PS, Kaufhold JP, Blinder P, Friedman B, Drew PJ, Karten HJ, Lyden PD, Kleinfeld D. 2009.  
1127 Correlations of Neuronal and Microvascular Densities in Murine Cortex Revealed by Direct  
1128 Counting and Colocalization of Nuclei and Vessels. *J Neurosci* **29**:14553–14570.  
1129 doi:10.1523/JNEUROSCI.3287-09.2009
- 1130 Uematsu M, Hirai Y, Karube F, Ebihara S, Kato M, Abe K, Obata K, Yoshida S, Hirabayashi M,  
1131 Yanagawa Y, Kawaguchi Y. 2008. Quantitative Chemical Composition of Cortical GABAergic  
1132 Neurons Revealed in Transgenic Venus-Expressing Rats. *Cereb Cortex* **18**:315–330.  
1133 doi:10.1093/cercor/bhm056
- 1134 van Vreeswijk C, Sompolinsky H. 1998. Chaotic Balanced State in a Model Of Cortical Circuits. *Neural*  
1135 *Computation* **10**:1321–1371.
- 1136 van Vreeswijk C, Sompolinsky H. 1996. Chaos in neuronal networks with balanced excitatory and  
1137 inhibitory activity. *Science* **274**:1724–1726.
- 1138 Varshney LR, Beth L. Chen. 2011. Structural Properties of the Caenorhabditis elegans Neuronal Network.  
1139 *PLoS Computational Biology* **12596**:1–41. doi:10.1371/journal.pcbi.1001066
- 1140 Vincent L. 1993. Morphological grayscale reconstruction in image analysis: applications and efficient  
1141 algorithms. *IEEE Transactions on Image Processing* **2**:176–201. doi:10.1109/83.217222
- 1142 Vogelstein JT, Watson BO, Packer AM, Yuste R, Jerny B, Paninski L. 2009. Spike inference from  
1143 calcium imaging using sequential Monte Carlo methods. *Biophysical Journal* **97**:636–655.  
1144 doi:10.1016/j.bpj.2008.08.005
- 1145 Wang Y, Toledo-Rodriguez M, Gupta A, Wu C, Silberberg G, Luo J, Markram H. 2004. Anatomical,  
1146 physiological and molecular properties of Martinotti cells in the somatosensory cortex of the  
1147 juvenile rat. *The Journal of Physiology* **561**:65–90. doi:10.1113/jphysiol.2004.073353
- 1148 Watts DJ, Strogatz SH. 1998. Collective dynamics of “small-world” networks. *Nature* **393**:440–442.
- 1149 Wendling F, Bartolomei F, Bellanger JJ, Chauvel P. 2002. Epileptic fast activity can be explained by a  
1150 model of impaired GABAergic dendritic inhibition. *European Journal of Neuroscience* **15**:1499–  
1151 1508.

- 1152 White EL. 1979. Thalamocortical synaptic relations: A review with emphasis on the projections of  
1153 specific thalamic nuclei to the primary sensory areas of the neocortex. *Brain Research Reviews*  
1154 **1**:275–311. doi:10.1016/0165-0173(79)90008-0  
1155 Wozny C, Williams SR. 2011. Specificity of Synaptic Connectivity between Layer 1 Inhibitory  
1156 Interneurons and Layer 2/3 Pyramidal Neurons in the Rat Neocortex. *Cereb Cortex* **21**:1818–  
1157 1826. doi:10.1093/cercor/bhq257  
1158 Xu X, Roby KD, Callaway EM. 2006. Mouse cortical inhibitory neuron type that coexpresses  
1159 somatostatin and calretinin. *Journal of Comparative Neurology* **499**:144–160.  
1160 doi:10.1002/cne.21101  
1161 Zeldenrust F, Calcini N, Yan X, Bijlsma A, Celikel T. 2020. Cell type specific information transfer for  
1162 sparse coding. *bioRxiv* 2020.11.06.371658. doi:10.1101/2020.11.06.371658  
1163 Zeldenrust F, Wadman WJ, Englitz B. 2018. Neural Coding With Bursts—Current State and Future  
1164 Perspectives. *Frontiers in Computational Neuroscience* **12**:1–14. doi:10.3389/fncom.2018.00048  
1165 Zheng Y, Lin S, Kambhamettu C, Yu J, Kang SB. 2009. Single-Image Vignetting Correction. *IEEE*  
1166 *Transactions on Pattern Analysis and Machine Intelligence* **31**:2243–2256.  
1167 doi:10.1109/TPAMI.2008.263  
1168 Zhu W, Shelley M, Shapley R. 2009. A neuronal network model of primary visual cortex explains spatial  
1169 frequency selectivity. *Journal of Computational Neuroscience* **26**:271–287. doi:10.1007/s10827-  
1170 008-0110-x  
1171  
1172

1173 **Figures**

1174

1175

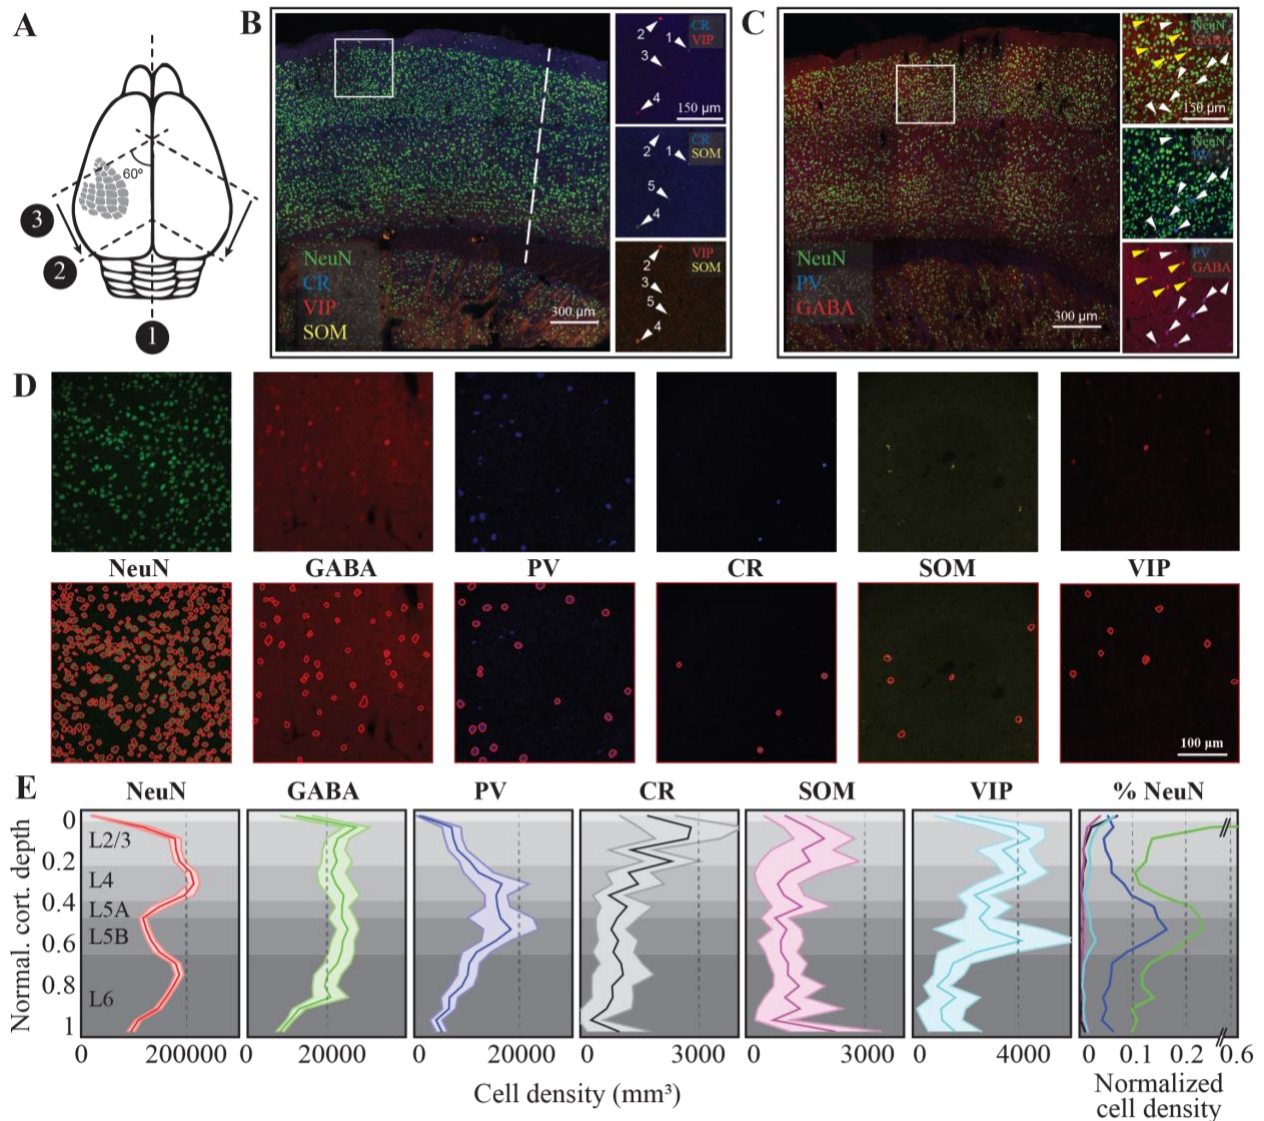

1176

1177 **Figure 1. The anatomy of the canonical cortical column in the mouse barrel cortex.** (A) Schematic  
 1178 representation of the slicing approach. Numbers refer to the order of incision (1,2) and sectioning (3) (see  
 1179 Materials and Methods for details). (B-C) Six monoclonal antibodies raised against select cellular markers  
 1180 were used for co-staining cellular classes. Insets show different staining patterns. Cell labeled with the  
 1181 same number is the same cell across different stainings. (D) Randomly selected raw images (top row) along  
 1182 with automatically detected cells in a 300x300x25 microm volume of fixed tissue (see Materials and  
 1183 Methods for details). (E) Density of identified cellular populations across the six cortical layers. The shaded  
 1184 regions represent 2 standard deviations from the mean (N=22 slices for NeuN, 12 for GABA, PV and 10  
 1185 for CR, SOM, VIP; in average 3 columns in each slice from 3 animals, 5 hemispheres. Values are mean  
 1186 and std calculated from each slice). The last column represents the relative cellular density after normalizing  
 1187 the cell count to the number of NeuN positive neurons in a given layer.

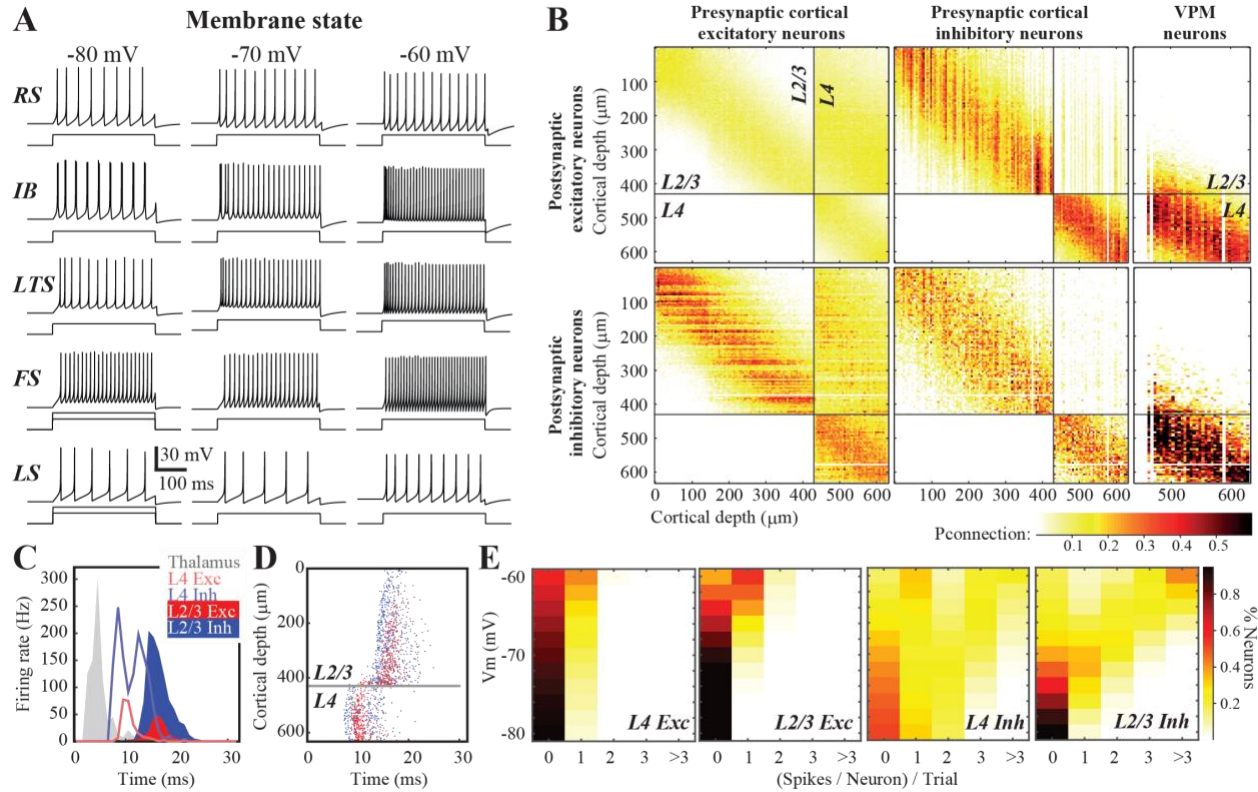

1188

1189 **Figure 2. Neural activity and circuit connectivity *in silico*.** (A) Spiking pattern of five electrically  
 1190 characterized cell classes upon somatic step-and-hold current injection across three membrane states. (B)  
 1191 The connectivity matrix across the network. (C) Emergent cortical activity upon thalamic stimulation,  
 1192 simulated as a response to a single whisker deflection (Petersen et al., 2008). Peristimulus time histograms  
 1193 (PSTHs) depict population responses across thalamus (modeled; see Materials and Methods for details),  
 1194 and cortical responses. (D) Same as in C but action potentials from neurons in the top 630 microm of the  
 1195 cortical column are shown. (E) Likelihood of spiking across identified neuron classes and membrane states.  
 1196

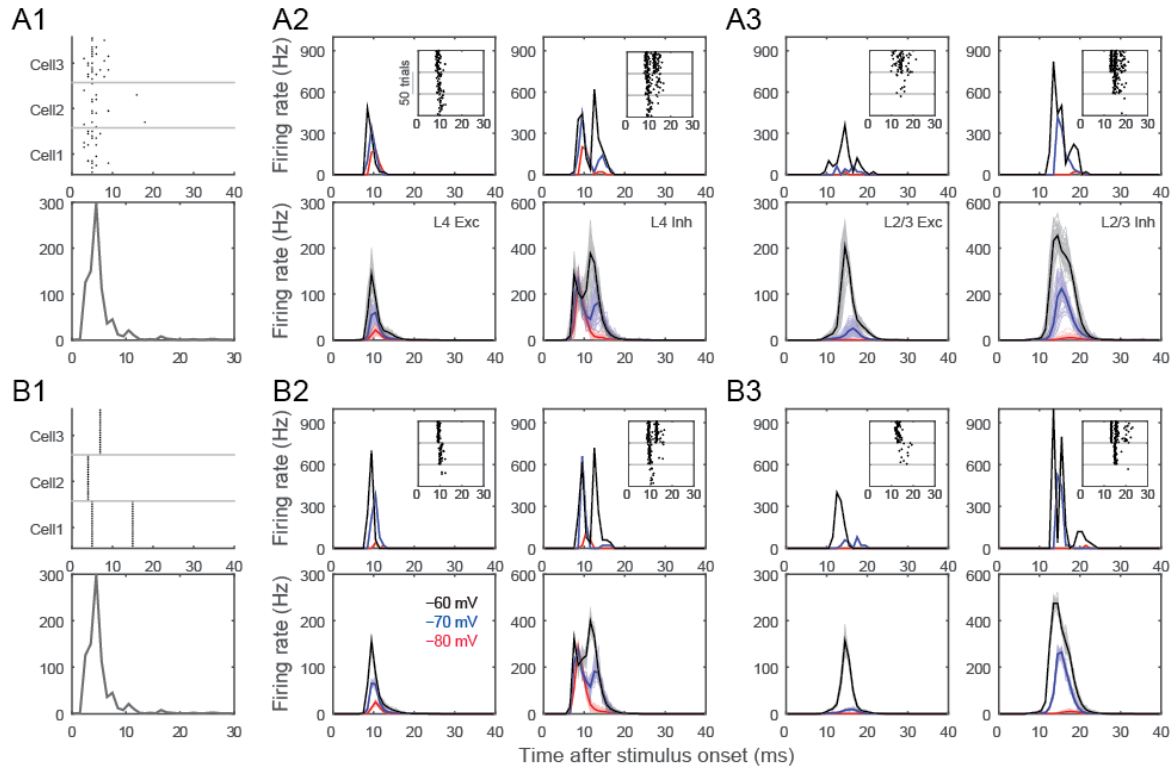

1197

1198 **Figure 3. Variability of stimulus representations in silico.** (A1) The population activity in thalamus is  
 1199 constrained by the PSTH as spike timing for individual cells are drawn according to Poisson-distributions.  
 1200 Raster plots exemplify the spiking responses of 3 representative thalamic neurons across 20 trials (upper  
 1201 panel) drawn from the population PSTH (lower panel). (A2) Representation of the thalamic input in single  
 1202 (upper panels) neurons and populations (lower panels). Left column: L4 excitatory, right column: L4  
 1203 inhibitory neurons. PSTHs represent neural responses to 50 thalamic stimulation across three different  
 1204 membrane states (black: -60 mV, blue: -70 mV, red: -80 mV) (A3) Same as in A2, but for L2/3 excitatory  
 1205 and inhibitory neurons. (B1) The population PSTH in thalamus is the same as in A1 (lower panel), but spike  
 1206 timing and rate of individual thalamic neurons' spiking is constant across trials (see raster plots in upper  
 1207 panel). (B2, B3) same as in A2, A3, but show cortical response to stereotypic thalamic inputs. Note that  
 1208 even when the same thalamic input pattern was used to stimulate the network, neurons still showed spike  
 1209 timing variability due to synaptic failures and synaptic strength variations although the variance was greatly  
 1210 reduced as the effective connectivity in the network was kept constant.

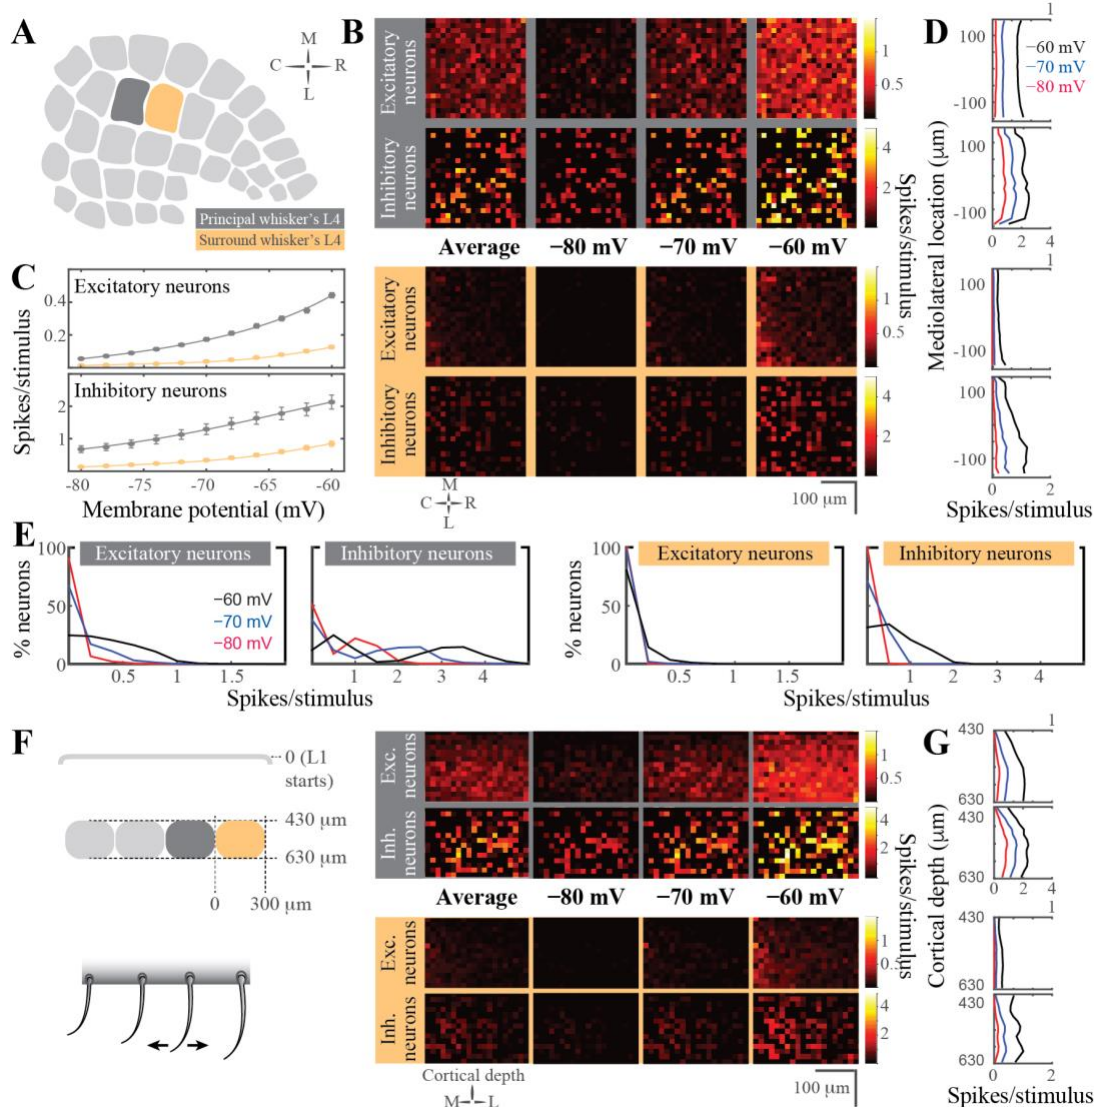

1211

1212 **Figure 4. Stimulus evoked representations in cortical layer 4 *in silico*.** (A) Schematic representation of  
 1213 the spatial orientation of the simulated network. The visualizations are in the tangential plane. The principal  
 1214 cortical column is the D2 whisker's column. (B) Average neuronal response in rostro-caudal (RC) and  
 1215 medio-lateral (ML) planes, across different resting membrane states (pixel size 15x15  $\mu\text{m}$  in cortical tissue).  
 1216 The figurines on the grey shaded background display the response in the principal whisker's cortical  
 1217 column; the yellow background shows the activity in the first order surrounding L4. (C) Average firing  
 1218 rate of excitatory (top) and inhibitory neurons (bottom) in the network as a function of the resting membrane  
 1219 potential before stimulus onset in the principal (top) and surround (bottom) whisker's L4. (D) Average  
 1220 firing rate in the ML axis across the membrane states. (E) Distribution of the spiking response per stimulus  
 1221 across neuron classes and membrane states. (F) Left: Schematic representation of the coronal orientation  
 1222 of the visualized network. Right: Average neuronal response across the dorsoventral plane in L4 (pixel size  
 1223 15x15  $\mu\text{m}$  in cortical tissue). (G) Average firing rate across cortical depth.

1224

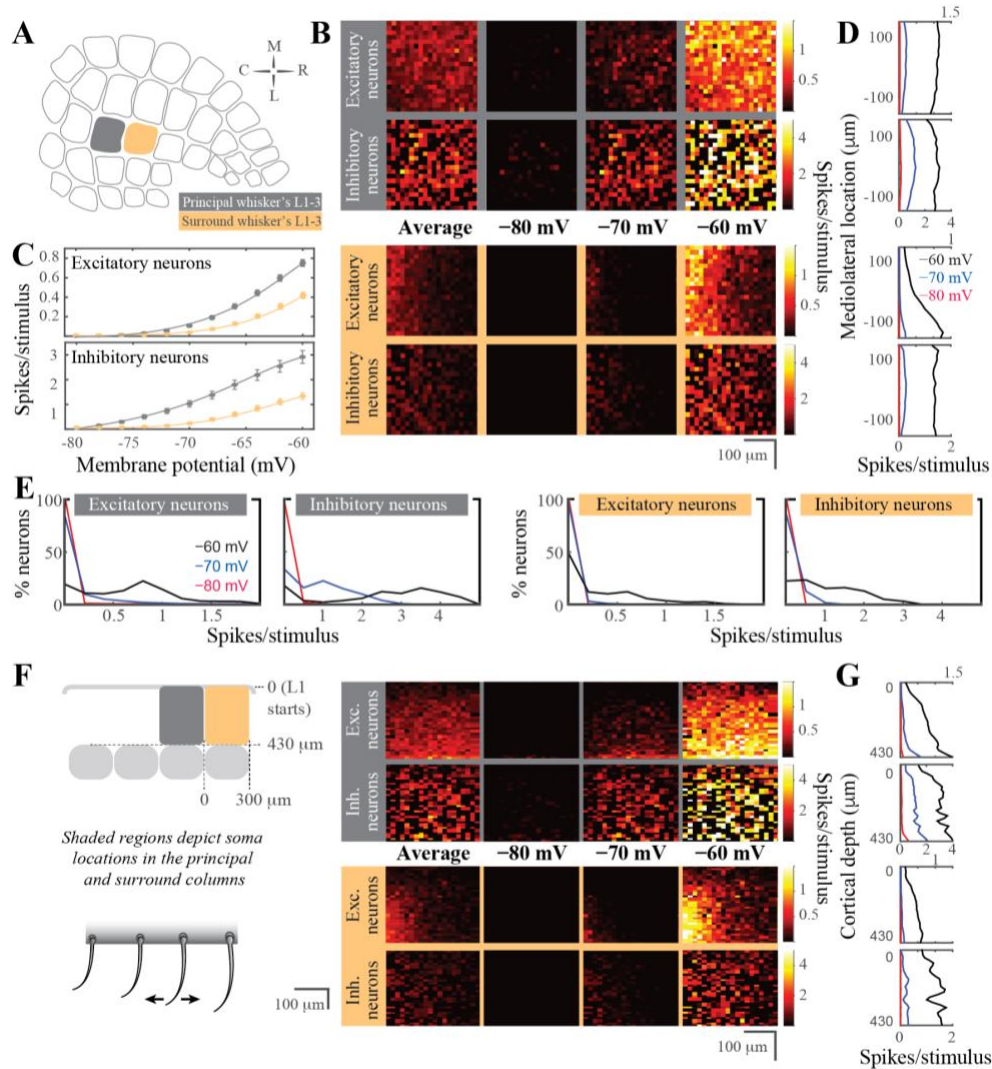

1225

1226 **Figure 5. Stimulus evoked representations in the supragranular layers of the barrel cortical network**  
 1227 ***in silico*.** (A) Schematic representation of the spatial orientation of the simulated network in the tangential  
 1228 plane. The principal cortical column is the D2 whisker's column. (B) Average neuronal response mapped  
 1229 onto rostro-caudal (RC) and medio-lateral (ML) planes, across resting membrane states (pixel size 15x15  
 1230  $\mu\text{m}$  in cortical tissue). The figurines on the grey shaded background display the response in the principal  
 1231 whisker's cortical column; yellow background shows the activity in the first order surrounding  
 1232 supragranular layers. (C) Average firing rate of excitatory (top) and inhibitory neurons (bottom) in the  
 1233 network as a function of the resting membrane potential before stimulus onset in the principal (top) and  
 1234 surround (bottom) whisker's cortical network. (D) Average firing rate in the ML axis across the membrane  
 1235 states. (E) Distribution of the spiking response per stimulus across neuron classes and membrane states.  
 1236 (F) Left: Schematic representation of the coronal orientation of the visualized network. Right: Average  
 1237 neuronal response across the dorsoventral plane in L4 (pixel size 15x15  $\mu\text{m}$  in cortical tissue). (G) Average  
 1238 firing rate across cortical depth.  
 1239



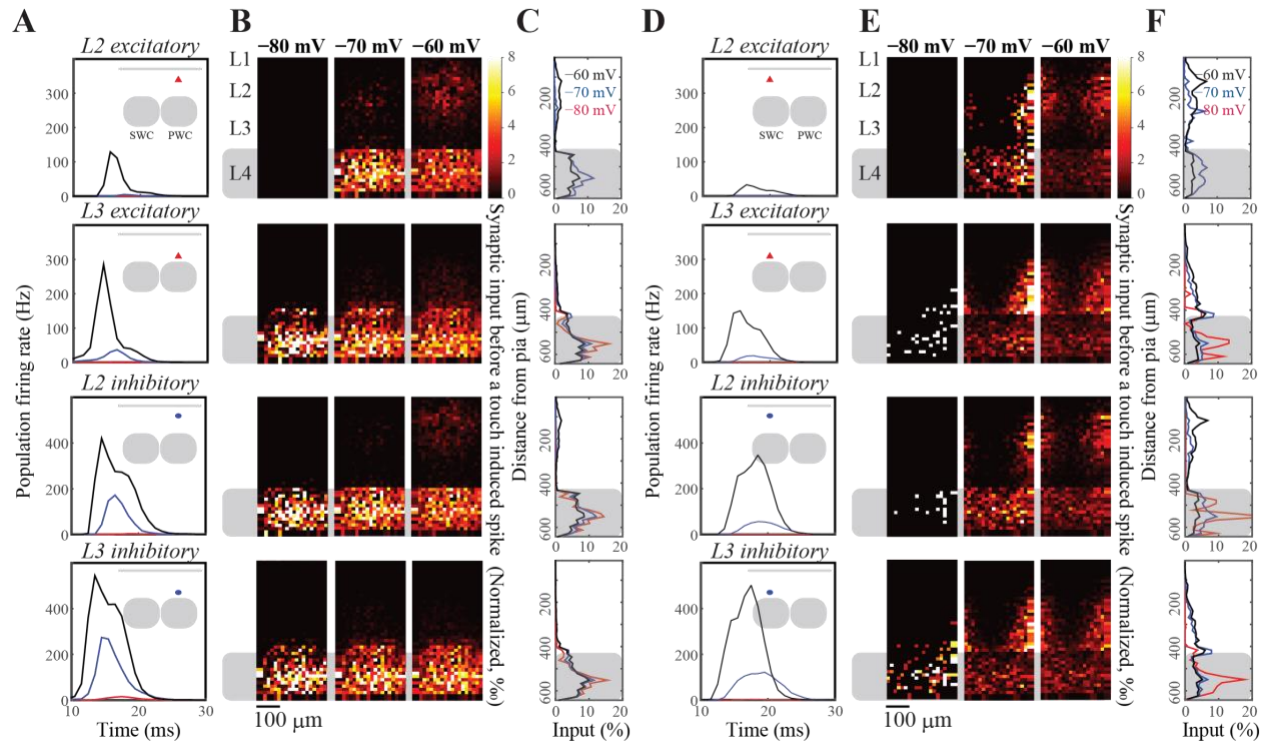

1240

1241

**Figure 6. Visualization of the presynaptic population contributing to a postsynaptic action potential.**

1242

We spatially mapped the neural activity across the granular and supragranular layers prior to an action potential in a given layer. The maps were averaged across all postsynaptic neurons that fire evoked action potentials during the simulations. (A) Population activity that drives L2 excitatory (first row), inhibitory

1243

(second row), L3 excitatory (third row) and L3 inhibitory (last row) neurons to spike in response to thalamic

1244

input. The first spike fired by aforementioned L2 or L3 neurons was used as the trigger to calculate the spike-triggered input map. Insert: schematic representation of the location of different cell populations in

1245

the barrel column. (B) Spike triggered spatial averaging (rows as in A); columns denote network activity

1246

observed across different resting membrane potentials. (C) Average depth distribution of excitatory inputs

1247

to drive a spike (rows as in A). (D-F) Same as A-C, but using surround whisker stimulation (SWC) instead

1248

of principal whisker stimulation (PWC).

1249

1250

1251

1252

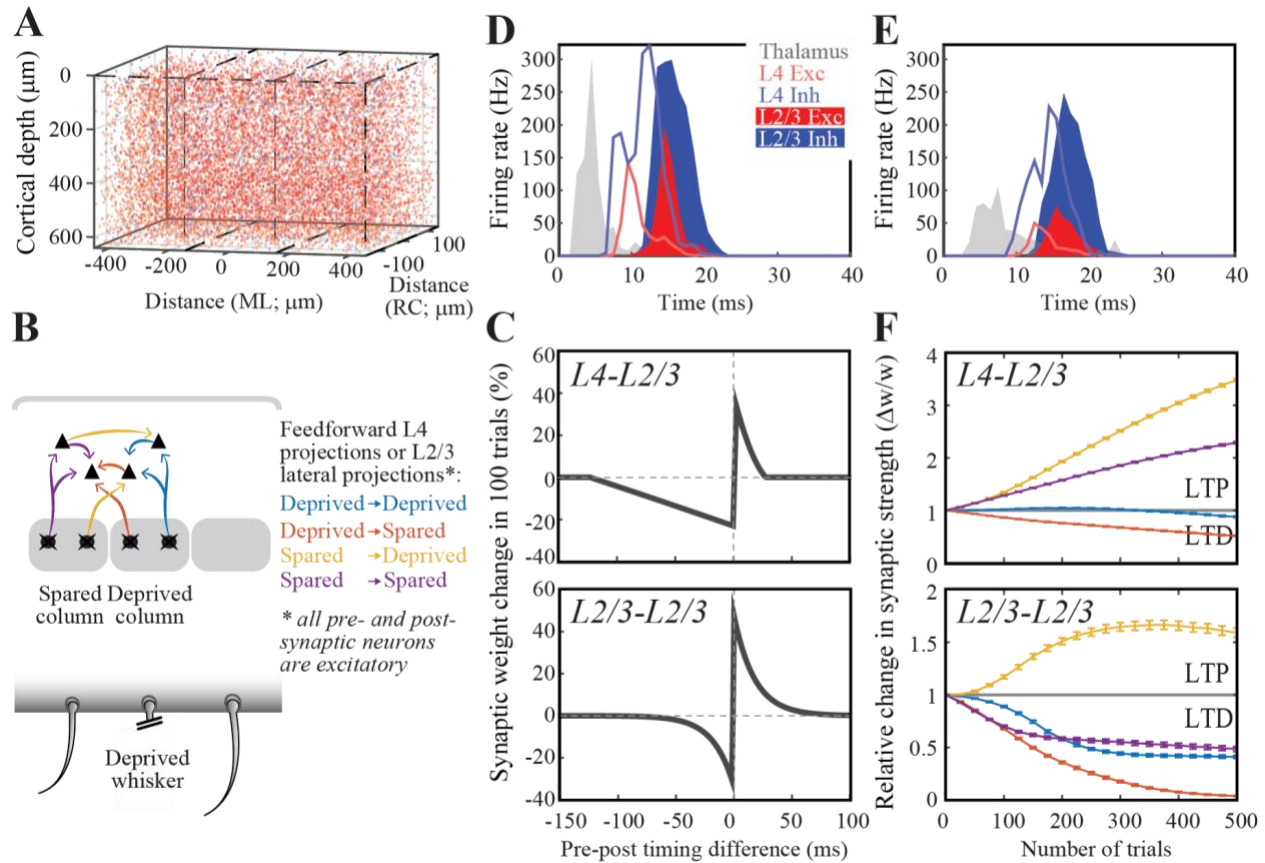

1253

1254 **Figure 7. Spike-timing dependent map plasticity *in silico*.** (A) A network model with 3 barrels. Cells in  
 1255 each column are randomly generated using distributions quantified in Figure 1. (B) Schematic  
 1256 representation of the feed-forward and intracolumnar networks in the upper layers of the somatosensory  
 1257 cortex. (C) Experimentally observed STDP learning rule in L4-L2/3 projections (top; Celikel et al 2004;  
 1258 see Materials and Methods) and for L2/3-L2/3 connections (bottom; Banerjee et al 2014). (D) Population  
 1259 PSTH for the spared columns, i.e. most medial and most lateral columns in A1. (E) Population PSTH  
 1260 for the deprived, i.e. center, column. (F) Change in synaptic efficacy as a function of whisker deprivation in  
 1261 the simulated network. Color codes denote the whisker deprivation status of pre- and postsynaptic neurons'  
 1262 location. Note that presynaptic neurons are always located in L4.  
 1263

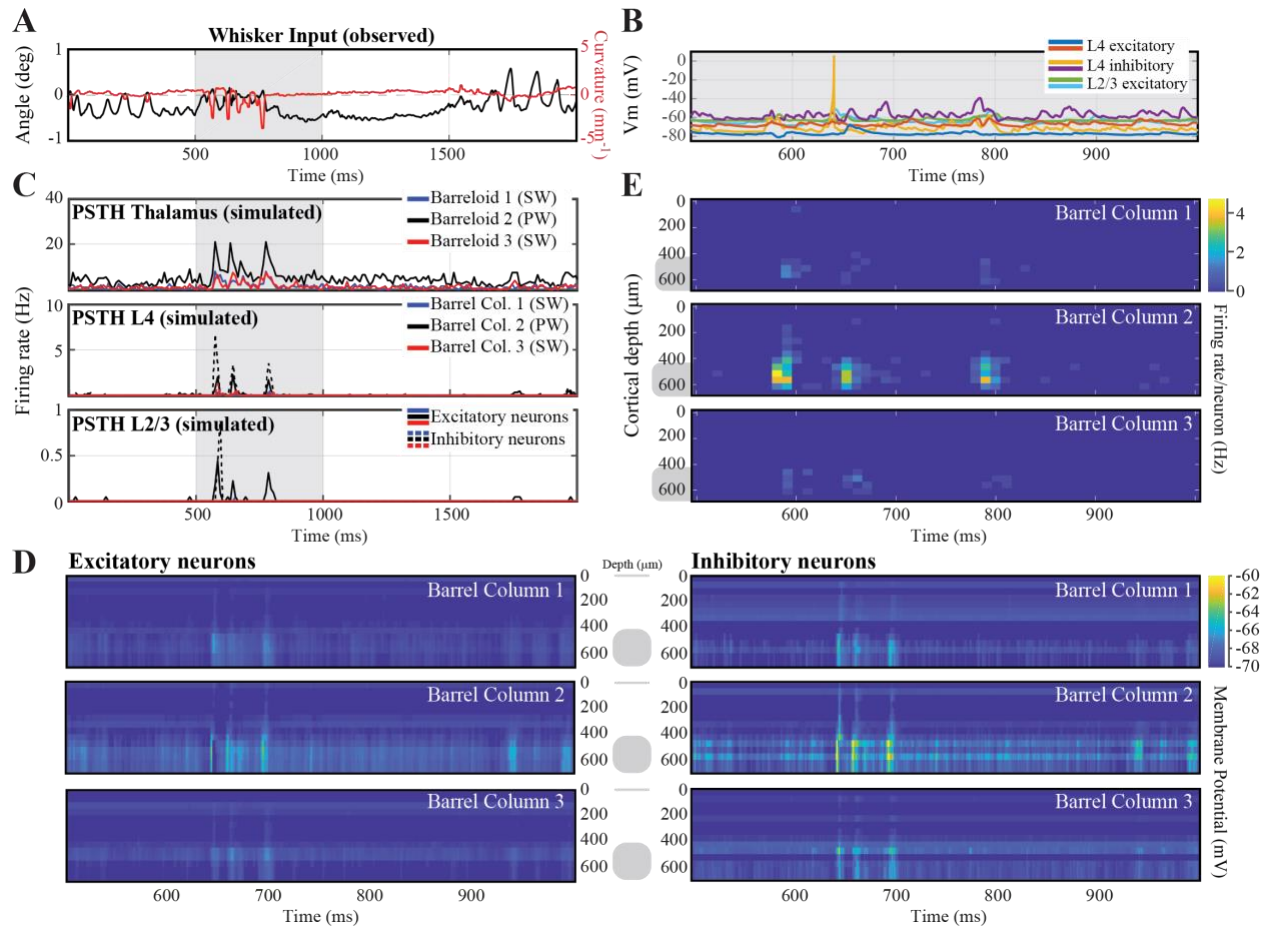

1264

1265 **Figure 8. Network response to *in vivo*-like stimulation.** (A) Input to the network: whisker angle (black)  
 1266 and curvature (red) from a freely moving rat in a pole localization task (data from (Peron et al., 2015), made  
 1267 available as 'ssc-2' on CRCNS.org). (B) Example voltage trace responses of 6 randomly chosen model  
 1268 neurons. (C) Peri-Stimulus Time Histograms (PSTHs) of the model-thalamus (top), L4 (middle) and L2/3  
 1269 (bottom). The thalamus consists of 3 barreloids, each containing 200 'filter-and-fire' neurons that respond  
 1270 to whisker angle, curvature or a combination of both. The central barreloid (black, 2) receives a stronger  
 1271 input, as this is the 'stimulated' barrel for the only spared whisker. Spike trains of the thalamus are sent to  
 1272 the cortical network model of L4 (middle), which sends its spike trains to L2/3 (bottom). These similarly  
 1273 consist of 3 barrels, of which the central (black, 2) barrel belongs to the spared whisker. (D) Average  
 1274 membrane potential of the excitatory (left) and inhibitory (right) model neurons as a function of cortical  
 1275 depth. L4 (barrel cortex) is denoted with a grey shaded shape. (E) Average firing rates of the model neurons  
 1276 as a function of cortical depth.

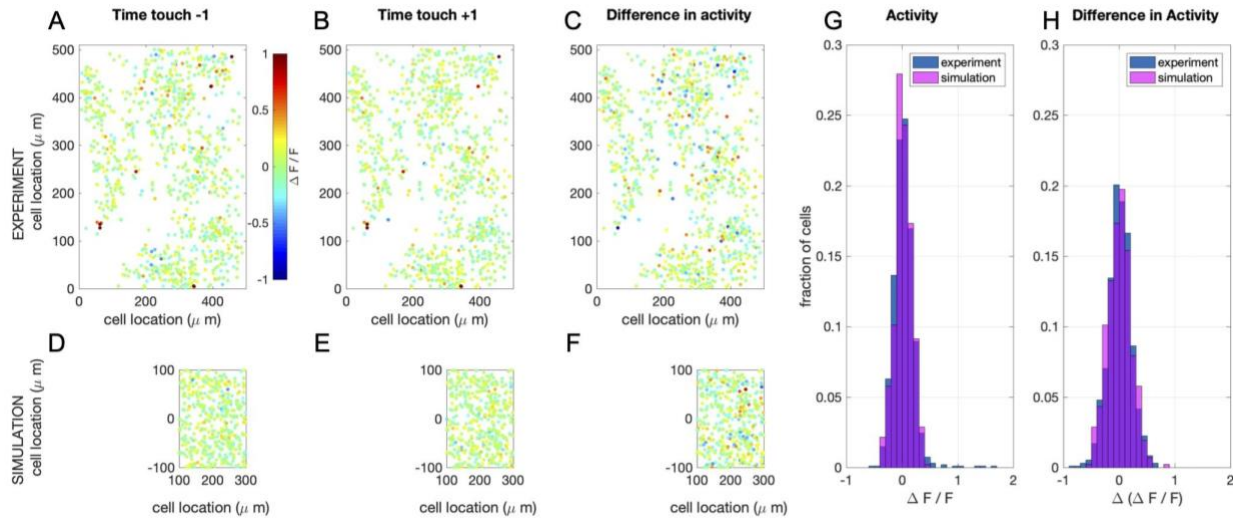

1277  
1278  
1279  
1280  
1281  
1282  
1283  
1284  
1285  
1286  
1287

**Figure 9. Simulation of calcium imaging experiment in L2/3.** (A) Recorded (Peron et al., 2015) network response one (time) frame before touch (sampling frequency: 7 Hz; recorded volume: 6). (B) Recorded network response one frame after touch (C) Difference in network response between before and after touch. (D-F) Same as in A-C, but now for simulations (full simulation: single barrel including L23 (shown here) and L4 (see supplemental Figure 4). The fluorescence signal was calculated from network response following the method in (Vogelstein et al., 2009). Note that a recorded volume is larger than a single barrel. The frames are scaled accordingly. (G) Comparison of the distribution of activity of one frame after touch between the recorded and the simulated network. (H) Comparison of the distribution of the difference in activity between one frame before and after touch between the recorded and the simulated network.
